# Supplementary material for: Protein Biomarker Discovery Studies on Urinary sEV Fractions Separated with UF-SEC for the First Diagnosis and Detection of Recurrence in Bladder Cancer Patients
Source: MDPI journal article supplement (doi:10.3390/biom13060932), 2023-06-01
Supplement: s1 [file s1]

## Supplementary Materials

**Table S1: Patient samples used for pool** - Abbreviations: BC, bladder cancer.

| Sample ID    | Sample preparation batch | Gender | Experimental group            |
|--------------|--------------------------|--------|-------------------------------|
| HC010        | 1                        | Female | Healthy                       |
| HC004        | 1                        | Male   | Healthy                       |
| M5           | 2                        | Male   | Healthy                       |
| V3           | 2                        | Female | Healthy                       |
| M12          | 2                        | Male   | Healthy                       |
| M1           | 2                        | Male   | Healthy                       |
| M17          | 2                        | Male   | Healthy                       |
| HC023        | 2                        | Male   | Healthy                       |
| HC003        | 1                        | Male   | Healthy                       |
| BC118        | 1                        | Female | First BC diagnosis            |
| BC156        | 1                        | Male   | First BC diagnosis            |
| BC301_1      | 4                        | Male   | First BC diagnosis            |
| BC402        | 2                        | Female | First BC diagnosis            |
| BC400        | 2                        | Male   | First BC diagnosis            |
| BC309        | 2                        | Male   | First BC diagnosis            |
| BC803        | 2                        | Male   | First BC diagnosis            |
| BC129        | 2                        | Male   | First BC diagnosis            |
| BC154        | 2                        | Male   | First BC diagnosis            |
| BC130_1      | 4                        | Male   | Tumor free with history of BC |
| BC015_4      | 3                        | Male   | Tumor free with history of BC |
| BC119_1      | 4                        | Male   | Tumor free with history of BC |
| BC156_3      | 4                        | Male   | Tumor free with history of BC |
| BC052_3      | 3                        | Male   | Tumor free with history of BC |
| BC126_1      | 3                        | Female | Tumor free with history of BC |
| BC040_1_1930 | 3                        | Male   | Tumor free with history of BC |
| BC012_2      | 3                        | Male   | Tumor free with history of BC |
| BC808_1      | 3                        | Male   | Tumor free with history of BC |
| BC301_2      | 2                        | Male   | Tumor free with history of BC |
| BC014_1      | 4                        | Male   | Relapse of BC                 |
| BC011_2      | 3                        | Male   | Relapse of BC                 |
| BC046_1      | 3                        | Male   | Relapse of BC                 |
| BC184_1      | 3                        | Female | Relapse of BC                 |
| BC143_1_2080 | 3                        | Male   | Relapse of BC                 |
| BC806_1      | 3                        | Male   | Relapse of BC                 |
| BC102_1      | 3                        | Male   | Relapse of BC                 |
| BC140_1_2022 | 4                        | Male   | Relapse of BC                 |

Table S2: The full list of 1,226 quantified proteins.

5

| Protein name                                                      | Gene name    | Number of unique peptides (seq, z) |
|-------------------------------------------------------------------|--------------|------------------------------------|
| 1,5-anhydro-D-fructose reductase                                  | AKR1E2       | 1                                  |
| 14 kDa phosphohistidine phosphatase                               | PHPT1        | 2                                  |
| 14-3-3 protein beta/alpha                                         | YWHAB        | 8                                  |
| 14-3-3 protein epsilon                                            | YWHAE        | 2                                  |
| 14-3-3 protein eta                                                | YWHAH        | 2                                  |
| 14-3-3 protein gamma                                              | YWHAG        | 2                                  |
| 14-3-3 protein sigma                                              | SFN          | 3                                  |
| 14-3-3 protein theta                                              | YWHAQ        | 5                                  |
| 14-3-3 protein zeta/delta                                         | YWHAZ        | 12                                 |
| 15-hydroxyprostaglandin dehydrogenase [NAD(+)]                    | HPGD         | 6                                  |
| 1-phosphatidylinositol 4,5-bisphosphate phosphodiesterase beta-3  | PLCB3        | 1                                  |
| 1-phosphatidylinositol 4,5-bisphosphate phosphodiesterase delta-1 | PLCD1        | 12                                 |
| 2',3'-cyclic-nucleotide 3'-phosphodiesterase                      | CNP          | 15                                 |
| 2'-deoxynucleoside 5'-phosphate N-hydrolase 1                     | DNPH1        | 1                                  |
| 3 beta-hydroxysteroid dehydrogenase/Delta 5-->4-isomerase type 1  | HSD3B1       | 1                                  |
| 3-hydroxybutyrate dehydrogenase type 2                            | BDH2         | 4                                  |
| 3-mercaptopyruvate sulfurtransferase                              | MPST         | 8                                  |
| 40S ribosomal protein S24                                         | RPS24        | 1                                  |
| 4F2 cell-surface antigen heavy chain                              | SLC3A2       | 5                                  |
| 4-trimethylaminobutyaldehyde dehydrogenase                        | ALDH9A1      | 3                                  |
| 5'(3')-deoxyribonucleotidase, cytosolic type                      | NT5C         | 2                                  |
| 60S acidic ribosomal protein P1                                   | RPLP1        | 1                                  |
| 60S ribosomal protein L12                                         | RPL12        | 1                                  |
| 60S ribosomal protein L7                                          | RPL7         | 1                                  |
| 6-phosphogluconate dehydrogenase, decarboxylating                 | PGD          | 7                                  |
| 6-phosphogluconolactonase                                         | PGLS         | 14                                 |
| ABHD14A-ACY1 readthrough                                          | ABHD14A-ACY1 | 1                                  |
| Abl interactor 1                                                  | ABI1         | 1                                  |
| Abl interactor 1                                                  | ABI1         | 2                                  |
| Acetyl-CoA acetyltransferase, cytosolic                           | ACAT2        | 1                                  |
| Acid ceramidase                                                   | ASAH1        | 4                                  |
| Actin-related protein 2                                           | ACTR2        | 4                                  |
| Actin-related protein 2/3 complex subunit 1A                      | ARPC1A       | 1                                  |
| Actin-related protein 2/3 complex subunit 1B                      | ARPC1B       | 3                                  |
| Actin-related protein 2/3 complex subunit 2                       | ARPC2        | 3                                  |
| Actin-related protein 2/3 complex subunit 4                       | ARPC4        | 3                                  |
| Actin-related protein 2/3 complex subunit 5                       | ARPC5        | 1                                  |
| Actin-related protein 3                                           | ACTR3        | 8                                  |
| Acylamino-acid-releasing enzyme                                   | APEH         | 1                                  |

| Protein name                                                   | Gene name | Number of unique peptides (seq, z) |
|----------------------------------------------------------------|-----------|------------------------------------|
| Acyl-CoA synthetase short-chain family member 3, mitochondrial | ACSS3     | 1                                  |
| Acyl-CoA-binding protein                                       | DBI       | 1                                  |
| Acyl-protein thioesterase 1                                    | LYPLA1    | 3                                  |
| Adapter molecule crk                                           | CRK       | 2                                  |
| Adenine phosphoribosyltransferase                              | APRT      | 3                                  |
| Adenosylhomocysteinase                                         | AHCY      | 4                                  |
| Adenylate kinase isoenzyme 1                                   | AK1       | 2                                  |
| Adenylate kinase isoenzyme 1                                   | AK1       | 2                                  |
| Adenylyl cyclase-associated protein 1                          | CAP1      | 1                                  |
| Adipogenesis regulatory factor                                 | ADIRF     | 5                                  |
| ADP-ribosyl cyclase/cyclic ADP-ribose hydrolase 2              | BST1      | 1                                  |
| ADP-ribosyl cyclase/cyclic ADP-ribose hydrolase 2              | BST1      | 2                                  |
| ADP-ribosylation factor 4                                      | ARF4      | 1                                  |
| ADP-ribosylation factor 6                                      | ARF6      | 4                                  |
| ADP-ribosylation factor-like protein 13B                       | ARL13B    | 1                                  |
| ADP-ribosylation factor-like protein 15                        | ARL15     | 3                                  |
| ADP-ribosylation factor-like protein 15                        | ARL15     | 5                                  |
| ADP-ribosylation factor-like protein 3                         | ARL3      | 1                                  |
| Adseverin                                                      | SCIN      | 8                                  |
| Aflatoxin B1 aldehyde reductase member 3                       | AKR7A3    | 3                                  |
| Aflatoxin B1 aldehyde reductase member 4                       | AKR7L     | 1                                  |
| Aggrecan core protein                                          | ACAN      | 6                                  |
| Aggrecan core protein                                          | ACAN      | 6                                  |
| Agrin                                                          | AGRN      | 7                                  |
| Alanine--tRNA ligase, cytoplasmic                              | AARS      | 1                                  |
| Alcohol dehydrogenase [NADP(+)]                                | AKR1A1    | 7                                  |
| Alcohol dehydrogenase class-3                                  | ADH5      | 6                                  |
| Aldehyde dehydrogenase family 3 member B1                      | ALDH3B1   | 2                                  |
| Aldo-keto reductase family 1 member C2                         | AKR1C2    | 1                                  |
| Aldose 1-epimerase                                             | GALM      | 2                                  |
| Aldose reductase                                               | AKR1B1    | 7                                  |
| Alpha/beta hydrolase domain-containing protein 14B             | ABHD14B   | 6                                  |
| Alpha/beta hydrolase domain-containing protein 17C             | ABHD17C   | 1                                  |
| Alpha-1-acid glycoprotein 1                                    | ORM1      | 2                                  |
| Alpha-1-antichymotrypsin                                       | SERPINA3  | 15                                 |
| Alpha-1-antitrypsin                                            | SERPINA1  | 20                                 |
| Alpha-1-antitrypsin                                            | SERPINA1  | 24                                 |
| Alpha-1B-glycoprotein                                          | A1BG      | 26                                 |
| Alpha-2-antiplasmin                                            | SERPINF2  | 3                                  |
| Alpha-2-HS-glycoprotein                                        | AHSG      | 1                                  |
| Alpha-2-HS-glycoprotein                                        | AHSG      | 19                                 |
| Alpha-2-macroglobulin                                          | A2M       | 35                                 |
| Alpha-2-macroglobulin-like protein 1                           | A2ML1     | 1                                  |

| Protein name                                          | Gene name | Number of unique peptides (seq, z) |
|-------------------------------------------------------|-----------|------------------------------------|
| Alpha-actinin-1                                       | ACTN1     | 1                                  |
| Alpha-actinin-4                                       | ACTN4     | 9                                  |
| Alpha-aminoadipic semialdehyde dehydrogenase          | ALDH7A1   | 2                                  |
| Alpha-amylase 1                                       | AMY1A     | 1                                  |
| Alpha-centractin                                      | ACTR1A    | 1                                  |
| Alpha-enolase                                         | ENO1      | 29                                 |
| Alpha-N-acetylgalactosaminidase                       | NAGA      | 1                                  |
| Alpha-N-acetylglucosaminidase                         | NAGLU     | 24                                 |
| Alpha-parvin                                          | PARVA     | 1                                  |
| Amiloride-sensitive amine oxidase [copper-containing] | AOC1      | 4                                  |
| Aminoacylase-1                                        | ACY1      | 6                                  |
| Aminopeptidase B                                      | RNPEP     | 3                                  |
| Aminopeptidase N                                      | ANPEP     | 36                                 |
| Ammonium transporter Rh type C                        | RHCG      | 2                                  |
| Angiopoietin-related protein 2                        | ANGPTL2   | 8                                  |
| Angiotensin-converting enzyme 2                       | ACE2      | 5                                  |
| Angiotensin-converting enzyme                         | ACE       | 6                                  |
| Angiotensinogen                                       | AGT       | 8                                  |
| Ankyrin repeat domain-containing protein 24           | ANKRD24   | 1                                  |
| Annexin A1                                            | ANXA1     | 22                                 |
| Annexin A11                                           | ANXA11    | 35                                 |
| Annexin A2                                            | ANXA2     | 7                                  |
| Annexin A3                                            | ANXA3     | 8                                  |
| Annexin A4                                            | ANXA4     | 15                                 |
| Annexin A5                                            | ANXA5     | 20                                 |
| Annexin A6                                            | ANXA6     | 8                                  |
| Annexin A7                                            | ANXA7     | 8                                  |
| Annexin A9                                            | ANXA9     | 6                                  |
| Anoctamin-6                                           | ANO6      | 3                                  |
| Anthrax toxin receptor 1                              | ANTXR1    | 1                                  |
| Antithrombin-III                                      | SERPINC1  | 1                                  |
| Apolipoprotein A-I                                    | APOA1     | 29                                 |
| Apolipoprotein A-II                                   | APOA2     | 10                                 |
| Apolipoprotein A-II                                   | APOA2     | 3                                  |
| Apolipoprotein A-IV                                   | APOA4     | 33                                 |
| Apolipoprotein B-100                                  | APOB      | 16                                 |
| Apolipoprotein C-I                                    | APOC1     | 1                                  |
| Apolipoprotein D (Fragment)                           | APOD      | 2                                  |
| Apolipoprotein D                                      | APOD      | 14                                 |
| Apolipoprotein E                                      | APOE      | 14                                 |
| Aquaporin-1                                           | AQP1      | 3                                  |
| Aquaporin-2                                           | AQP2      | 8                                  |
| Arginase-1                                            | ARG1      | 3                                  |
| Argininosuccinate synthase                            | ASS1      | 16                                 |

| Protein name                                                                | Gene name | Number of unique peptides (seq, z) |
|-----------------------------------------------------------------------------|-----------|------------------------------------|
| Aromatic-L-amino-acid decarboxylase                                         | DDC       | 2                                  |
| Arrestin domain-containing protein 1                                        | ARRDC1    | 5                                  |
| Arylsulfatase A                                                             | ARSA      | 3                                  |
| Aspartate aminotransferase, cytoplasmic                                     | GOT1      | 7                                  |
| ATP synthase subunit alpha, mitochondrial                                   | ATP5A1    | 1                                  |
| ATP-citrate synthase                                                        | ACLY      | 1                                  |
| ATP-sensitive inward rectifier potassium channel 1                          | KCNJ1     | 2                                  |
| Attractin                                                                   | ATRN      | 2                                  |
| Azurocidin                                                                  | AZU1      | 2                                  |
| Band 3 anion transport protein                                              | SLC4A1    | 3                                  |
| Barrier-to-autointegration factor                                           | BANF1     | 1                                  |
| Basal cell adhesion molecule                                                | BCAM      | 11                                 |
| Basement membrane-specific heparan sulfate proteoglycan core protein        | HSPG2     | 15                                 |
| Basigin                                                                     | BSG       | 2                                  |
| Beta-1,4-galactosyltransferase 1                                            | B4GALT1   | 4                                  |
| Beta-1,4-glucuronyltransferase 1                                            | B4GAT1    | 3                                  |
| Beta-2-glycoprotein 1                                                       | APOH      | 1                                  |
| Beta-2-microglobulin                                                        | B2M       | 1                                  |
| Beta-arrestin-1                                                             | ARRB1     | 1                                  |
| Beta-enolase                                                                | ENO3      | 2                                  |
| Beta-galactosidase                                                          | GLB1      | 5                                  |
| Betaine--homocysteine S-methyltransferase 1                                 | BHMT      | 8                                  |
| Bifunctional epoxide hydrolase 2                                            | EPHX2     | 1                                  |
| Bifunctional purine biosynthesis protein PURH                               | ATIC      | 2                                  |
| Biglycan                                                                    | BGN       | 3                                  |
| Bile salt-activated lipase                                                  | CEL       | 2                                  |
| Biotinidase                                                                 | BTD       | 1                                  |
| Bisphosphoglycerate mutase                                                  | BPGM      | 2                                  |
| Bone marrow stromal antigen 2                                               | BST2      | 1                                  |
| Bone morphogenetic protein 7                                                | BMP7      | 1                                  |
| BPI fold-containing family B member 2                                       | BPIFB2    | 2                                  |
| Brain acid soluble protein 1                                                | BASP1     | 4                                  |
| Brain-specific angiogenesis inhibitor 1-associated protein 2                | BAIAP2    | 4                                  |
| Brain-specific angiogenesis inhibitor 1-associated protein 2                | BAIAP2    | 13                                 |
| Brain-specific angiogenesis inhibitor 1-associated protein 2-like protein 1 | BAIAP2L1  | 11                                 |
| Breakpoint cluster region protein                                           | BCR       | 2                                  |
| Breast carcinoma-amplified sequence 1                                       | BCAS1     | 3                                  |
| BRO1 domain-containing protein BROX                                         | BROX      | 15                                 |
| BTB/POZ domain-containing protein KCTD12                                    | KCTD12    | 1                                  |
| Cadherin-15                                                                 | CDH15     | 7                                  |
| Cadherin-16                                                                 | CDH16     | 1                                  |
| Calbindin                                                                   | CALB1     | 5                                  |

| Protein name                                                                           | Gene name | Number of unique peptides (seq, z) |
|----------------------------------------------------------------------------------------|-----------|------------------------------------|
| Calcineurin B homologous protein 1                                                     | CHP1      | 1                                  |
| Calcium and integrin-binding protein 1                                                 | CIB1      | 6                                  |
| Calcium-binding protein 39                                                             | CAB39     | 4                                  |
| Calcium-binding protein 39-like                                                        | CAB39L    | 2                                  |
| Calcium-independent phospholipase A2-gamma                                             | PNPLA8    | 1                                  |
| Calcyphosin                                                                            | CAPS      | 1                                  |
| Calcyphosin                                                                            | CAPS      | 8                                  |
| Calmodulin-like protein 5                                                              | CALML5    | 1                                  |
| Calpain small subunit 1                                                                | CAPNS1    | 3                                  |
| Calpain-1 catalytic subunit                                                            | CAPN1     | 6                                  |
| Calpain-2 catalytic subunit                                                            | CAPN2     | 2                                  |
| Calpain-5                                                                              | CAPN5     | 1                                  |
| Calpain-5                                                                              | CAPN5     | 18                                 |
| Calpain-7                                                                              | CAPN7     | 21                                 |
| cAMP-dependent protein kinase catalytic subunit alpha                                  | PRKACA    | 2                                  |
| cAMP-dependent protein kinase catalytic subunit beta                                   | PRKACB    | 1                                  |
| cAMP-dependent protein kinase type I-alpha regulatory subunit                          | PRKAR1A   | 1                                  |
| cAMP-dependent protein kinase type II-alpha regulatory subunit                         | PRKAR2A   | 4                                  |
| Capping protein (Actin filament) muscle Z-line, beta, isoform CRA_d                    | CAPZB     | 1                                  |
| Carbonic anhydrase 1                                                                   | CA1       | 9                                  |
| Carbonic anhydrase 2                                                                   | CA2       | 15                                 |
| Carbonic anhydrase 4                                                                   | CA4       | 8                                  |
| Carbonyl reductase [NADPH] 1                                                           | CBR1      | 11                                 |
| Carboxymethylenebutenolidase homolog                                                   | CMBL      | 3                                  |
| Carboxypeptidase B2                                                                    | CPB2      | 1                                  |
| Carboxypeptidase M                                                                     | CPM       | 6                                  |
| Carboxypeptidase N subunit 2                                                           | CPN2      | 3                                  |
| Carboxypeptidase Q                                                                     | CPQ       | 1                                  |
| Carboxy-terminal domain RNA polymerase II polypeptide A small phosphatase 1 (Fragment) | CTDSP1    | 1                                  |
| Carboxy-terminal domain RNA polymerase II polypeptide A small phosphatase 1            | CTDSP1    | 1                                  |
| Carcinoembryonic antigen-related cell adhesion molecule 5                              | CEACAM5   | 2                                  |
| Carcinoembryonic antigen-related cell adhesion molecule 5                              | CEACAM5   | 4                                  |
| Carcinoembryonic antigen-related cell adhesion molecule 7                              | CEACAM7   | 3                                  |
| Cartilage intermediate layer protein 1                                                 | CILP      | 1                                  |
| Cartilage intermediate layer protein 2                                                 | CILP2     | 4                                  |
| Cartilage oligomeric matrix protein                                                    | COMP      | 1                                  |
| Casein kinase I isoform gamma-1                                                        | CSNK1G1   | 1                                  |
| Caspase-14                                                                             | CASP14    | 4                                  |
| Catalase                                                                               | CAT       | 4                                  |
| Catechol O-methyltransferase                                                           | COMT      | 6                                  |

| Protein name                                                        | Gene name | Number of unique peptides (seq, z) |
|---------------------------------------------------------------------|-----------|------------------------------------|
| Cathelicidin antimicrobial peptide                                  | CAMP      | 1                                  |
| Cathepsin B                                                         | CTSB      | 3                                  |
| Cathepsin D                                                         | CTSD      | 10                                 |
| Cathepsin G                                                         | CTSG      | 3                                  |
| Cathepsin Z                                                         | CTSZ      | 3                                  |
| CD177 antigen                                                       | CD177     | 2                                  |
| CD2-associated protein                                              | CD2AP     | 16                                 |
| CD44 antigen                                                        | CD44      | 1                                  |
| CD59 glycoprotein                                                   | CD59      | 4                                  |
| CD59 glycoprotein                                                   | CD59      | 14                                 |
| CD63 antigen                                                        | CD63      | 1                                  |
| CD81 antigen                                                        | CD81      | 3                                  |
| CD9 antigen                                                         | CD9       | 6                                  |
| cDNA FLJ55673, highly similar to Complement factor B (EC 3.4.21.47) | N/A       | 7                                  |
| Cell cycle control protein 50A                                      | TMEM30A   | 1                                  |
| Cell division control protein 42 homolog                            | CDC42     | 12                                 |
| Cell division cycle 5-like protein                                  | CDC5L     | 1                                  |
| Cell surface glycoprotein MUC18                                     | MCAM      | 2                                  |
| Cellular retinoic acid-binding protein 2                            | CRABP2    | 2                                  |
| Centromere protein T                                                | CENPT     | 1                                  |
| Cerebral cavernous malformations 2 protein                          | CCM2      | 1                                  |
| Ceruloplasmin                                                       | CP        | 23                                 |
| Ceruloplasmin                                                       | CP        | 28                                 |
| Charged multivesicular body protein 1a                              | CHMP1A    | 5                                  |
| Charged multivesicular body protein 1b                              | CHMP1B    | 4                                  |
| Charged multivesicular body protein 2a                              | CHMP2A    | 7                                  |
| Charged multivesicular body protein 2b                              | CHMP2B    | 6                                  |
| Charged multivesicular body protein 3                               | CHMP3     | 4                                  |
| Charged multivesicular body protein 4a                              | CHMP4A    | 2                                  |
| Charged multivesicular body protein 4b                              | CHMP4B    | 9                                  |
| Charged multivesicular body protein 4c                              | CHMP4C    | 2                                  |
| Charged multivesicular body protein 5                               | CHMP5     | 10                                 |
| Charged multivesicular body protein 6                               | CHMP6     | 2                                  |
| Chloride intracellular channel protein 1                            | CLIC1     | 16                                 |
| Chloride intracellular channel protein 3                            | CLIC3     | 4                                  |
| Chloride intracellular channel protein 4                            | CLIC4     | 1                                  |
| Chloride intracellular channel protein 6                            | CLIC6     | 4                                  |
| Cholesteryl ester transfer protein                                  | CETP      | 1                                  |
| Choline transporter-like protein 1                                  | SLC44A1   | 1                                  |
| Choline transporter-like protein 2                                  | SLC44A2   | 12                                 |
| Choline transporter-like protein 4                                  | SLC44A4   | 1                                  |
| Chondroitin sulfate proteoglycan 4                                  | CSPG4     | 3                                  |
| Cingulin                                                            | CGN       | 1                                  |

| Protein name                                          | Gene name | Number of unique peptides (seq, z) |
|-------------------------------------------------------|-----------|------------------------------------|
| C-Jun-amino-terminal kinase-interacting protein 4     | SPAG9     | 1                                  |
| Clathrin heavy chain 1                                | CLTC      | 3                                  |
| Clusterin                                             | CLU       | 17                                 |
| Coactosin-like protein                                | COTL1     | 4                                  |
| Cofilin-1                                             | CFL1      | 1                                  |
| Cofilin-1                                             | CFL1      | 7                                  |
| Cofilin-2                                             | CFL2      | 3                                  |
| Coiled-coil and C2 domain-containing protein 1A       | CC2D1A    | 6                                  |
| Coiled-coil domain-containing protein 168             | CCDC168   | 1                                  |
| Collagen alpha-1(III) chain                           | COL3A1    | 1                                  |
| Collagen alpha-1(VI) chain                            | COL6A1    | 18                                 |
| Collagen alpha-1(XV) chain                            | COL15A1   | 2                                  |
| Collagen alpha-1(XVIII) chain                         | COL18A1   | 2                                  |
| Collagen alpha-2(I) chain                             | COL1A2    | 1                                  |
| Collagen alpha-2(IV) chain                            | COL4A2    | 3                                  |
| Collagen alpha-3(VI) chain                            | COL6A3    | 5                                  |
| Complement C1q subcomponent subunit B                 | C1QB      | 1                                  |
| Complement C1q subcomponent subunit C                 | C1QC      | 2                                  |
| Complement C1r subcomponent-like protein              | C1RL      | 3                                  |
| Complement C1s subcomponent                           | C1S       | 1                                  |
| Complement C2                                         | C2        | 1                                  |
| Complement C3                                         | C3        | 65                                 |
| Complement C4-A                                       | C4A       | 1                                  |
| Complement C4-A                                       | C4A       | 1                                  |
| Complement C4-A                                       | C4A       | 1                                  |
| Complement C4-B                                       | C4B       | 2                                  |
| Complement C4-B                                       | C4B       | 2                                  |
| Complement C5                                         | C5        | 3                                  |
| Complement component C7                               | C7        | 1                                  |
| Complement component C8 gamma chain                   | C8G       | 1                                  |
| Complement component C9                               | C9        | 4                                  |
| Complement decay-accelerating factor                  | CD55      | 6                                  |
| Complement factor B                                   | CFB       | 8                                  |
| Complement factor D                                   | CFD       | 2                                  |
| Complement factor I                                   | CFI       | 1                                  |
| Complement receptor type 1                            | CR1       | 8                                  |
| Constitutive coactivator of PPAR-gamma-like protein 2 | FAM120C   | 2                                  |
| Copine-1                                              | CPNE1     | 1                                  |
| Copine-2                                              | CPNE2     | 1                                  |
| Copine-3                                              | CPNE3     | 13                                 |
| Copine-5                                              | CPNE5     | 1                                  |
| Copine-8                                              | CPNE8     | 8                                  |
| Corneodesmosin                                        | CDSN      | 1                                  |
| Cornifelin                                            | CNFN      | 1                                  |



| Protein name                                                | Gene name | Number of unique peptides (seq, z) |
|-------------------------------------------------------------|-----------|------------------------------------|
| Cornifin-A                                                  | SPRR1A    | 1                                  |
| Coronin-1A                                                  | CORO1A    | 2                                  |
| Coronin-1B                                                  | CORO1B    | 3                                  |
| Corticosteroid-binding globulin                             | SERPINA6  | 1                                  |
| Creatine kinase B-type                                      | CKB       | 5                                  |
| CTD small phosphatase-like protein                          | CTDSPL    | 2                                  |
| Cubilin                                                     | CUBN      | 21                                 |
| Cullin-associated NEDD8-dissociated protein 1               | CAND1     | 1                                  |
| Cyclin-Y-like protein 1                                     | CCNYL1    | 1                                  |
| Cystatin-A                                                  | CSTA      | 1                                  |
| Cystatin-B                                                  | CSTB      | 3                                  |
| Cystatin-C                                                  | CST3      | 2                                  |
| Cysteine and glycine-rich protein 1                         | CSRP1     | 2                                  |
| Cysteine-rich and transmembrane domain-containing protein 1 | CYSTM1    | 1                                  |
| Cysteine-rich C-terminal protein 1                          | CRCT1     | 1                                  |
| Cysteine-rich motor neuron 1 protein                        | CRIM1     | 3                                  |
| Cysteine-rich protein 2                                     | CRIP2     | 4                                  |
| Cysteine-rich tail protein 1                                | CYSRT1    | 4                                  |
| Cysteine-rich tail protein 1                                | CYSRT1    | 1                                  |
| Cytochrome b reductase 1                                    | CYBRD1    | 1                                  |
| Cytochrome c oxidase subunit 6B2                            | COX6B2    | 1                                  |
| Cytochrome P450 26B1                                        | CYP26B1   | 1                                  |
| Cytoplasmic aconitate hydratase                             | ACO1      | 3                                  |
| Cytoplasmic dynein 2 heavy chain 1                          | DYNC2H1   | 1                                  |
| Cytoplasmic FMR1-interacting protein 1                      | CYFIP1    | 1                                  |
| Cytoplasmic FMR1-interacting protein 2                      | CYFIP2    | 1                                  |
| Cytoplasmic tRNA 2-thiolation protein 2                     | CTU2      | 1                                  |
| Cytosol aminopeptidase                                      | LAP3      | 2                                  |
| Cytosolic 10-formyltetrahydrofolate dehydrogenase           | ALDH1L1   | 1                                  |
| Cytosolic non-specific dipeptidase                          | CNDP2     | 14                                 |
| D-3-phosphoglycerate dehydrogenase                          | PHGDH     | 6                                  |
| DCC-interacting protein 13-beta                             | APPL2     | 1                                  |
| DDB1- and CUL4-associated factor 11                         | DCAF11    | 1                                  |
| D-dopachrome decarboxylase                                  | DDT       | 1                                  |
| D-dopachrome decarboxylase                                  | DDT       | 1                                  |
| Dehydrogenase/reductase SDR family member 2, mitochondrial  | DHRS2     | 1                                  |
| Deleted in malignant brain tumors 1 protein                 | DMBT1     | 5                                  |
| Delta-aminolevulinic acid dehydratase                       | ALAD      | 1                                  |
| DENN domain-containing protein 1A                           | DENND1A   | 1                                  |
| Deoxyribonuclease-1                                         | DNASE1    | 3                                  |
| Deoxyribonuclease-2-alpha                                   | DNASE2    | 1                                  |
| Dermatopontin                                               | DPT       | 1                                  |

| Protein name                                                     | Gene name | Number of unique peptides (seq, z) |
|------------------------------------------------------------------|-----------|------------------------------------|
| Dermcidin                                                        | DCD       | 4                                  |
| Desmocollin-1                                                    | DSC1      | 2                                  |
| Desmoglein-1                                                     | DSG1      | 4                                  |
| Desmoplakin                                                      | DSP       | 23                                 |
| Destrin                                                          | DSTN      | 6                                  |
| Dihydropteridine reductase                                       | QDPR      | 1                                  |
| Dihydropyrimidinase                                              | DPYS      | 1                                  |
| Dipeptidase 1                                                    | DPEP1     | 12                                 |
| Dipeptidyl peptidase 1                                           | CTSC      | 2                                  |
| Dipeptidyl peptidase 2                                           | DPP7      | 4                                  |
| Dipeptidyl peptidase 4                                           | DPP4      | 14                                 |
| Disabled homolog 2                                               | DAB2      | 1                                  |
| Disco-interacting protein 2 homolog B                            | DIP2B     | 3                                  |
| Disintegrin and metalloproteinase domain-containing protein 9    | ADAM9     | 2                                  |
| DnaJ homolog subfamily A member 1                                | DNAJA1    | 1                                  |
| DnaJ homolog subfamily A member 2                                | DNAJA2    | 1                                  |
| DnaJ homolog subfamily B member 2                                | DNAJB2    | 1                                  |
| Drebrin-like protein                                             | DBNL      | 2                                  |
| Dual specificity protein phosphatase 3                           | DUSP3     | 2                                  |
| Dynamin-2                                                        | DNM2      | 3                                  |
| Dynamin-3                                                        | DNM3      | 1                                  |
| Dynein heavy chain 7, axonemal                                   | DNAH7     | 1                                  |
| Dystroglycan                                                     | DAG1      | 2                                  |
| E3 ubiquitin-protein ligase Itchy homolog                        | ITCH      | 6                                  |
| E3 ubiquitin-protein ligase MIB2                                 | MIB2      | 1                                  |
| E3 ubiquitin-protein ligase NEDD4-like                           | NEDD4L    | 1                                  |
| E3 ubiquitin-protein ligase NEDD4-like                           | NEDD4L    | 1                                  |
| E3 ubiquitin-protein ligase pellino homolog 2                    | PELI2     | 1                                  |
| E3 ubiquitin-protein ligase TRIM17                               | TRIM17    | 1                                  |
| Echinoderm microtubule-associated protein-like 2                 | EML2      | 1                                  |
| Echinoderm microtubule-associated protein-like 2                 | EML2      | 1                                  |
| Ectonucleotide pyrophosphatase/phosphodiesterase family member 6 | ENPP6     | 1                                  |
| EGF-containing fibulin-like extracellular matrix protein 1       | EFEMP1    | 4                                  |
| EH domain-containing protein 1                                   | EHD1      | 1                                  |
| EH domain-containing protein 1                                   | EHD1      | 12                                 |
| EH domain-containing protein 3                                   | EHD3      | 2                                  |
| EH domain-containing protein 4                                   | EHD4      | 18                                 |
| Elongation factor 2                                              | EEF2      | 9                                  |
| Endonuclease domain-containing 1 protein                         | ENDOD1    | 4                                  |
| Endosialin                                                       | CD248     | 7                                  |
| Envoplakin                                                       | EVPL      | 47                                 |
| Eosinophil cationic protein                                      | RNASE3    | 2                                  |

| Protein name                                                       | Gene name | Number of unique peptides (seq, z) |
|--------------------------------------------------------------------|-----------|------------------------------------|
| Eosinophil peroxidase                                              | EPX       | 1                                  |
| Ephrin type-B receptor 4                                           | EPHB4     | 3                                  |
| Ephrin type-B receptor 6                                           | EPHB6     | 2                                  |
| Ephrin-B1                                                          | EFNB1     | 4                                  |
| Epidermal growth factor receptor kinase substrate 8 (Fragment)     | EPS8      | 1                                  |
| Epidermal growth factor receptor kinase substrate 8                | EPS8      | 23                                 |
| Epidermal growth factor receptor kinase substrate 8-like protein 1 | EPS8L1    | 20                                 |
| Epidermal growth factor receptor kinase substrate 8-like protein 2 | EPS8L2    | 33                                 |
| Epithelial discoidin domain-containing receptor 1                  | DDR1      | 1                                  |
| ER membrane protein complex subunit 7                              | EMC7      | 1                                  |
| Erythrocyte band 7 integral membrane protein                       | STOM      | 9                                  |
| Ester hydrolase C11orf54                                           | C11orf54  | 4                                  |
| Eukaryotic translation initiation factor 6                         | EIF6      | 4                                  |
| Excitatory amino acid transporter 3                                | SLC1A1    | 2                                  |
| Exportin-2                                                         | CSE1L     | 1                                  |
| Extracellular superoxide dismutase [Cu-Zn]                         | SOD3      | 3                                  |
| Ezrin                                                              | EZR       | 41                                 |
| F-actin-capping protein subunit alpha-1                            | CAPZA1    | 2                                  |
| F-actin-capping protein subunit alpha-2                            | CAPZA2    | 3                                  |
| F-actin-capping protein subunit beta                               | CAPZB     | 1                                  |
| F-actin-uncapping protein LRRC16A                                  | CARMIL1   | 1                                  |
| Far upstream element-binding protein 2                             | KHSRP     | 1                                  |
| Far upstream element-binding protein 2                             | KHSRP     | 1                                  |
| Fas apoptotic inhibitory molecule 1                                | FAIM      | 1                                  |
| Fatty acid synthase                                                | FASN      | 3                                  |
| Fatty acid-binding protein, epidermal                              | FABP5     | 2                                  |
| Fatty acid-binding protein, heart                                  | FABP3     | 2                                  |
| F-box only protein 50                                              | NCCRP1    | 1                                  |
| FERM and PDZ domain-containing protein 1                           | FRMPD1    | 1                                  |
| Ferritin heavy chain                                               | FTH1      | 2                                  |
| Ferritin light chain                                               | FTL       | 1                                  |
| Fibrinogen alpha chain                                             | FGA       | 24                                 |
| Fibrinogen beta chain                                              | FGB       | 24                                 |
| Fibrinogen gamma chain                                             | FGG       | 1                                  |
| Fibrinogen gamma chain                                             | FGG       | 18                                 |
| Fibroblast growth factor 1                                         | FGF1      | 1                                  |
| Fibroleukin                                                        | FGL2      | 2                                  |
| Fibronectin                                                        | FN1       | 1                                  |
| Fibulin-1                                                          | FBLN1     | 3                                  |
| Fibulin-1                                                          | FBLN1     | 4                                  |
| Filaggrin-2                                                        | FLG2      | 3                                  |

| Protein name                                              | Gene name | Number of unique peptides (seq, z) |
|-----------------------------------------------------------|-----------|------------------------------------|
| Filamin-B                                                 | FLNB      | 2                                  |
| Flavin reductase (NADPH)                                  | BLVRB     | 1                                  |
| Flotillin-1                                               | FLOT1     | 11                                 |
| Flotillin-2                                               | FLOT2     | 2                                  |
| Folate receptor alpha                                     | FOLR1     | 3                                  |
| Formimidoyltransferase-cyclodeaminase                     | FTCD      | 3                                  |
| Fructose-1,6-bisphosphatase 1                             | FBP1      | 8                                  |
| Fructose-bisphosphate aldolase A                          | ALDOA     | 13                                 |
| Fructose-bisphosphate aldolase B                          | ALDOB     | 9                                  |
| Fructose-bisphosphate aldolase C                          | ALDOC     | 3                                  |
| Fumarylacetoacetase                                       | FAH       | 2                                  |
| Galectin-1                                                | LGALS1    | 3                                  |
| Galectin-12                                               | LGALS12   | 1                                  |
| Galectin-3                                                | LGALS3    | 6                                  |
| Galectin-3-binding protein                                | LGALS3BP  | 19                                 |
| Galectin-7                                                | LGALS7    | 4                                  |
| Galectin-8                                                | LGALS8    | 1                                  |
| Gamma-glutamyl hydrolase                                  | GGH       | 3                                  |
| Gamma-glutamylaminocyclotransferase                       | GGACT     | 1                                  |
| Gamma-glutamylcyclotransferase                            | GGCT      | 1                                  |
| Gamma-glutamyltransferase 6                               | GGT6      | 4                                  |
| Gamma-glutamyltranspeptidase 1                            | GGT1      | 1                                  |
| Gamma-soluble NSF attachment protein                      | NAPG      | 2                                  |
| Gamma-synuclein                                           | SNCG      | 4                                  |
| Ganglioside GM2 activator                                 | GM2A      | 3                                  |
| Gap junction alpha-3 protein                              | GJA3      | 1                                  |
| GDP-L-fucose synthase                                     | TSTA3     | 1                                  |
| GDP-mannose 4,6 dehydratase                               | GMDS      | 1                                  |
| Gelsolin                                                  | GSN       | 12                                 |
| Glucose-6-phosphate isomerase                             | GPI       | 4                                  |
| Glutamyl-peptide cyclotransferase                         | QPCT      | 1                                  |
| Glutamyl aminopeptidase                                   | ENPEP     | 18                                 |
| Glutaredoxin-1                                            | GLRX      | 1                                  |
| Glutathione peroxidase 1                                  | GPX1      | 1                                  |
| Glutathione reductase, mitochondrial                      | GSR       | 3                                  |
| Glutathione S-transferase Mu 2                            | GSTM2     | 1                                  |
| Glutathione S-transferase Mu 3                            | GSTM3     | 7                                  |
| Glutathione S-transferase omega-1                         | GSTO1     | 2                                  |
| Glutathione S-transferase P                               | GSTP1     | 6                                  |
| Glutathione S-transferase theta-1                         | GSTT1     | 2                                  |
| Glutathione synthetase                                    | GSS       | 1                                  |
| Glyceraldehyde-3-phosphate dehydrogenase                  | GAPDH     | 16                                 |
| Glyceraldehyde-3-phosphate dehydrogenase, testis-specific | GAPDHS    | 1                                  |

| Protein name                                                       | Gene name | Number of unique peptides (seq, z) |
|--------------------------------------------------------------------|-----------|------------------------------------|
| Glycerol-3-phosphate dehydrogenase [NAD(+)], cytoplasmic           | GPD1      | 1                                  |
| Glycerol-3-phosphate dehydrogenase 1-like protein                  | GPD1L     | 3                                  |
| Glycine--tRNA ligase                                               | GARS      | 1                                  |
| Glycogen phosphorylase, brain form                                 | PYGB      | 1                                  |
| Glyoxalase domain-containing protein 4                             | GLOD4     | 6                                  |
| Glyoxylate reductase/hydroxypyruvate reductase                     | GRHPR     | 3                                  |
| Glyoxylate reductase/hydroxypyruvate reductase                     | GRHPR     | 1                                  |
| Golgi-associated plant pathogenesis-related protein 1              | GLIPR2    | 3                                  |
| G-protein coupled receptor 98                                      | GPR98     | 1                                  |
| G-protein coupled receptor family C group 5 member B               | GPRC5B    | 4                                  |
| G-protein coupled receptor family C group 5 member C               | GPRC5C    | 3                                  |
| Grancalcin                                                         | GCA       | 2                                  |
| Granulins                                                          | GRN       | 2                                  |
| Group XV phospholipase A2                                          | PLA2G15   | 2                                  |
| Growth factor receptor-bound protein 2                             | GRB2      | 3                                  |
| Growth factor receptor-bound protein 7                             | GRB7      | 2                                  |
| Growth/differentiation factor 15                                   | GDF15     | 3                                  |
| GTPase HRas                                                        | HRAS      | 1                                  |
| GTPase KRas                                                        | KRAS      | 1                                  |
| GTPase NRas                                                        | NRAS      | 1                                  |
| GTP-binding nuclear protein Ran (Fragment)                         | RAN       | 2                                  |
| GTP-binding nuclear protein Ran                                    | RAN       | 2                                  |
| GTP-binding protein Di-Ras2                                        | DIRAS2    | 1                                  |
| Guanine nucleotide-binding protein G(i) subunit alpha-1            | GNAI1     | 8                                  |
| Guanine nucleotide-binding protein G(i) subunit alpha-2            | GNAI2     | 14                                 |
| Guanine nucleotide-binding protein G(I)/G(S)/G(O) subunit gamma-10 | GNG10     | 1                                  |
| Guanine nucleotide-binding protein G(I)/G(S)/G(O) subunit gamma-12 | GNG12     | 3                                  |
| Guanine nucleotide-binding protein G(I)/G(S)/G(O) subunit gamma-5  | GNG5      | 2                                  |
| Guanine nucleotide-binding protein G(I)/G(S)/G(O) subunit gamma-7  | GNG7      | 1                                  |
| Guanine nucleotide-binding protein G(I)/G(S)/G(T) subunit beta-1   | GNB1      | 10                                 |
| Guanine nucleotide-binding protein G(I)/G(S)/G(T) subunit beta-2   | GNB2      | 7                                  |
| Guanine nucleotide-binding protein G(k) subunit alpha              | GNAI3     | 8                                  |
| Guanine nucleotide-binding protein G(q) subunit alpha              | GNAQ      | 8                                  |
| Guanine nucleotide-binding protein subunit alpha-11                | GNA11     | 6                                  |
| Guanine nucleotide-binding protein subunit alpha-13                | GNA13     | 10                                 |
| Guanine nucleotide-binding protein subunit alpha-14                | GNA14     | 2                                  |
| Guanine nucleotide-binding protein subunit beta-4                  | GNB4      | 1                                  |
| Haptoglobin                                                        | HP        | 7                                  |

| Protein name                                                                       | Gene name | Number of unique peptides (seq, z) |
|------------------------------------------------------------------------------------|-----------|------------------------------------|
| HCG2002594, isoform CRA_c                                                          | SEPT5     | 1                                  |
| Heat shock 70 kDa protein 12A                                                      | HSPA12A   | 2                                  |
| Heat shock 70 kDa protein 4                                                        | HSPA4     | 1                                  |
| Heat shock cognate 71 kDa protein                                                  | HSPA8     | 13                                 |
| Heat shock protein 75 kDa, mitochondrial                                           | TRAP1     | 1                                  |
| Heat shock protein beta-1                                                          | HSPB1     | 9                                  |
| Heat shock protein HSP 90-alpha                                                    | HSP90AA1  | 3                                  |
| Heat shock protein HSP 90-beta                                                     | HSP90AB1  | 1                                  |
| Heat shock-related 70 kDa protein 2                                                | HSPA2     | 6                                  |
| Heme-binding protein 1                                                             | HEBP1     | 4                                  |
| Hemicentin-1                                                                       | HMCN1     | 4                                  |
| Hemoglobin subunit alpha                                                           | HBA1      | 6                                  |
| Hemoglobin subunit beta (Fragment)                                                 | HBB       | 3                                  |
| Hemoglobin subunit beta                                                            | HBB       | 9                                  |
| Hemoglobin subunit delta (Fragment)                                                | HBD       | 1                                  |
| Hemoglobin subunit delta                                                           | HBD       | 3                                  |
| Hemopexin                                                                          | HPX       | 9                                  |
| Heparin cofactor 2                                                                 | SERPIND1  | 3                                  |
| Hepatocyte growth factor-regulated tyrosine kinase substrate                       | HGS       | 1                                  |
| High affinity cAMP-specific and IBMX-insensitive 3',5'-cyclic phosphodiesterase 8A | PDE8A     | 1                                  |
| Histamine N-methyltransferase                                                      | HNMT      | 1                                  |
| Histidine triad nucleotide-binding protein 1                                       | HINT1     | 2                                  |
| Histidine triad nucleotide-binding protein 3                                       | HINT3     | 1                                  |
| Histidine-rich glycoprotein                                                        | HRG       | 14                                 |
| Histone H1.5                                                                       | HIST1H1B  | 4                                  |
| Histone H4                                                                         | HIST1H4A  | 6                                  |
| HLA class II histocompatibility antigen, DM alpha chain                            | HLA-DMA   | 1                                  |
| HLA class II histocompatibility antigen, DM beta chain                             | HLA-DMB   | 3                                  |
| HLA class II histocompatibility antigen, DR alpha chain                            | HLA-DRA   | 1                                  |
| Homogentisate 1,2-dioxygenase                                                      | HGD       | 1                                  |
| Hornerin                                                                           | HRNR      | 1                                  |
| Hsp90 co-chaperone Cdc37                                                           | CDC37     | 1                                  |
| Hyaluronidase-1                                                                    | HYAL1     | 1                                  |
| Ig alpha-1 chain C region                                                          | IGHA1     | 8                                  |
| Ig alpha-2 chain C region                                                          | IGHA2     | 1                                  |
| Ig gamma-2 chain C region                                                          | IGHG2     | 8                                  |
| Ig heavy chain V-III region NIE                                                    | N/A       | 1                                  |
| Ig heavy chain V-III region TUR                                                    | N/A       | 1                                  |
| Ig kappa chain C region                                                            | IGKC      | 1                                  |
| Ig kappa chain V-III region B6                                                     | N/A       | 2                                  |
| Ig kappa chain V-III region GOL                                                    | N/A       | 2                                  |
| Ig kappa chain V-III region HAH                                                    | N/A       | 2                                  |

| Protein name                                                           | Gene name | Number of unique peptides (seq, z) |
|------------------------------------------------------------------------|-----------|------------------------------------|
| Ig kappa chain V-III region NG9 (Fragment)                             | N/A       | 1                                  |
| Ig kappa chain V-III region SIE                                        | N/A       | 3                                  |
| Ig kappa chain V-III region Ti                                         | N/A       | 2                                  |
| Ig kappa chain V-III region WOL                                        | N/A       | 3                                  |
| Ig kappa chain V-IV region B17                                         | N/A       | 2                                  |
| Ig kappa chain V-IV region JI                                          | N/A       | 1                                  |
| Ig kappa chain V-IV region Len                                         | N/A       | 2                                  |
| Ig lambda chain V-I region HA                                          | N/A       | 1                                  |
| Ig lambda chain V-I region NEWM                                        | N/A       | 2                                  |
| Ig lambda chain V-I region WAH                                         | N/A       | 1                                  |
| Ig lambda chain V-III region LOI                                       | N/A       | 1                                  |
| Ig mu chain C region                                                   | IGHM      | 1                                  |
| IgGFC-binding protein                                                  | FCGBP     | 2                                  |
| IgGFC-binding protein                                                  | FCGBP     | 18                                 |
| Immunoglobulin heavy constant alpha 2 (Fragment)                       | IGHA2     | 1                                  |
| Immunoglobulin heavy constant gamma 3                                  | IGHG3     | 4                                  |
| Immunoglobulin heavy constant gamma 4                                  | IGHG4     | 6                                  |
| Immunoglobulin heavy constant mu (Fragment)                            | IGHM      | 1                                  |
| Immunoglobulin heavy variable 1-18                                     | IGHV1-18  | 1                                  |
| Immunoglobulin heavy variable 3-49                                     | IGHV3-49  | 1                                  |
| Immunoglobulin heavy variable 5-51                                     | IGHV5-51  | 1                                  |
| Immunoglobulin J chain                                                 | JCHAIN    | 6                                  |
| Immunoglobulin kappa variable 2D-24 (non-functional) (Fragment)        | IGKV2D-24 | 1                                  |
| Immunoglobulin kappa variable 3-11                                     | IGKV3-11  | 1                                  |
| Immunoglobulin kappa variable 3D-20                                    | IGKV3D-20 | 1                                  |
| Immunoglobulin kappa variable 4-1                                      | IGKV4-1   | 2                                  |
| Immunoglobulin lambda-like polypeptide 1                               | IOLL1     | 1                                  |
| Immunoglobulin superfamily containing leucine-rich repeat protein      | ISLR      | 4                                  |
| Immunoglobulin superfamily member 8                                    | IGSF8     | 4                                  |
| Importin subunit beta-1                                                | KPNB1     | 2                                  |
| Inactive phospholipase D5                                              | PLD5      | 1                                  |
| InaD-like protein                                                      | INADL     | 10                                 |
| Inorganic pyrophosphatase 2, mitochondrial                             | PPA2      | 1                                  |
| Insulin-like growth factor-binding protein 2                           | IGFBP2    | 8                                  |
| Insulin-like growth factor-binding protein 7                           | IGFBP7    | 5                                  |
| Insulin-like growth factor-binding protein complex acid labile subunit | IGFALS    | 3                                  |
| Integral membrane protein 2B                                           | ITM2B     | 5                                  |
| Integrin alpha-3                                                       | ITGA3     | 2                                  |
| Integrin alpha-V                                                       | ITGAV     | 10                                 |
| Integrin beta-1                                                        | ITGB1     | 8                                  |
| Integrin beta-2                                                        | ITGB2     | 1                                  |

| Protein name                                 | Gene name | Number of unique peptides (seq, z) |
|----------------------------------------------|-----------|------------------------------------|
| Integrin beta-3                              | ITGB3     | 1                                  |
| Integrin beta-5                              | ITGB5     | 3                                  |
| Inter-alpha-trypsin inhibitor heavy chain H1 | ITIH1     | 4                                  |
| Inter-alpha-trypsin inhibitor heavy chain H2 | ITIH2     | 11                                 |
| Inter-alpha-trypsin inhibitor heavy chain H4 | ITIH4     | 23                                 |
| Interleukin-1 receptor antagonist protein    | IL1RN     | 1                                  |
| Isocitrate dehydrogenase [NADP] cytoplasmic  | IDH1      | 13                                 |
| IST1 homolog (Fragment)                      | IST1      | 11                                 |
| IST1 homolog (Fragment)                      | IST1      | 3                                  |
| IST1 homolog                                 | IST1      | 18                                 |
| ITIH4 protein                                | ITIH4     | 2                                  |
| Junction plakoglobin                         | JUP       | 7                                  |
| Junctional adhesion molecule A               | F11R      | 1                                  |
| Kallistatin                                  | SERPINA4  | 3                                  |
| Kelch domain-containing protein 7B           | KLHDC7B   | 1                                  |
| Keratin, type I cuticular Ha1                | KRT31     | 1                                  |
| Keratin, type I cuticular Ha3-II             | KRT33B    | 1                                  |
| Keratin, type I cytoskeletal 10              | KRT10     | 39                                 |
| Keratin, type I cytoskeletal 13              | KRT13     | 3                                  |
| Keratin, type I cytoskeletal 14              | KRT14     | 13                                 |
| Keratin, type I cytoskeletal 16              | KRT16     | 14                                 |
| Keratin, type I cytoskeletal 17              | KRT17     | 5                                  |
| Keratin, type I cytoskeletal 18              | KRT18     | 1                                  |
| Keratin, type I cytoskeletal 19              | KRT19     | 3                                  |
| Keratin, type I cytoskeletal 23              | KRT23     | 2                                  |
| Keratin, type I cytoskeletal 9               | KRT9      | 40                                 |
| Keratin, type II cuticular Hb2               | KRT82     | 1                                  |
| Keratin, type II cuticular Hb4               | KRT84     | 2                                  |
| Keratin, type II cuticular Hb5               | KRT85     | 2                                  |
| Keratin, type II cytoskeletal 1              | KRT1      | 56                                 |
| Keratin, type II cytoskeletal 1b             | KRT77     | 7                                  |
| Keratin, type II cytoskeletal 2 epidermal    | KRT2      | 43                                 |
| Keratin, type II cytoskeletal 3              | KRT3      | 1                                  |
| Keratin, type II cytoskeletal 4              | KRT4      | 3                                  |
| Keratin, type II cytoskeletal 5              | KRT5      | 18                                 |
| Keratin, type II cytoskeletal 6A             | KRT6A     | 2                                  |
| Keratin, type II cytoskeletal 6B             | KRT6B     | 2                                  |
| Keratin, type II cytoskeletal 7              | KRT7      | 7                                  |
| Keratin, type II cytoskeletal 74             | KRT74     | 1                                  |
| Keratin, type II cytoskeletal 78             | KRT78     | 3                                  |
| Keratin, type II cytoskeletal 8              | KRT8      | 6                                  |
| Keratin, type II cytoskeletal 80             | KRT80     | 2                                  |
| Keratin-associated protein 3-1               | KRTAP3-1  | 1                                  |
| Keratinocyte proline-rich protein            | KPRP      | 8                                  |



| Protein name                                                  | Gene name | Number of unique peptides (seq, z) |
|---------------------------------------------------------------|-----------|------------------------------------|
| Kin of IRRE-like protein 1                                    | KIRREL    | 1                                  |
| Kin of IRRE-like protein 3                                    | KIRREL3   | 1                                  |
| Kinesin-1 heavy chain                                         | KIF5B     | 1                                  |
| Kinesin-like protein KIF12                                    | KIF12     | 17                                 |
| Kininogen-1                                                   | KNG1      | 17                                 |
| Kunitz-type protease inhibitor 2                              | SPINT2    | 2                                  |
| Lactotransferrin                                              | LTF       | 11                                 |
| Lactoylglutathione lyase                                      | GLO1      | 5                                  |
| Lambda-crystallin homolog                                     | CRYL1     | 3                                  |
| Laminin subunit alpha-2                                       | LAMA2     | 1                                  |
| LanC-like protein 1                                           | LANCL1    | 2                                  |
| Leucine-rich alpha-2-glycoprotein                             | LRG1      | 23                                 |
| Leucine-rich repeat-containing protein 57                     | LRRC57    | 2                                  |
| Leucine-rich repeat-containing protein 71                     | LRRC71    | 1                                  |
| Leukocyte elastase inhibitor                                  | SERPINB1  | 2                                  |
| Leukocyte surface antigen CD47                                | CD47      | 1                                  |
| Leukotriene A-4 hydrolase                                     | LTA4H     | 1                                  |
| LIM and SH3 domain protein 1                                  | LASP1     | 4                                  |
| LIM domain and actin-binding protein 1                        | LIMA1     | 1                                  |
| Lipopolysaccharide-binding protein                            | LBP       | 1                                  |
| Lipopolysaccharide-induced tumor necrosis factor-alpha factor | LITAF     | 1                                  |
| LisH domain-containing protein ARMC9                          | ARMC9     | 1                                  |
| L-lactate dehydrogenase A chain                               | LDHA      | 3                                  |
| L-lactate dehydrogenase B chain                               | LDHB      | 14                                 |
| Long-chain fatty acid transport protein 4                     | SLC27A4   | 1                                  |
| Long-chain-fatty-acid--CoA ligase 4                           | ACSL4     | 3                                  |
| Loricrin                                                      | LOR       | 1                                  |
| Low molecular weight phosphotyrosine protein phosphatase      | ACP1      | 3                                  |
| Low-density lipoprotein receptor-related protein 2            | LRP2      | 25                                 |
| Lumican                                                       | LUM       | 5                                  |
| L-xylulose reductase                                          | DCXR      | 1                                  |
| Ly6/PLAUR domain-containing protein 2                         | LYPD2     | 1                                  |
| Lymphocyte antigen 6D                                         | LY6D      | 2                                  |
| Lysine-specific demethylase 2B                                | KDM2B     | 1                                  |
| Lysophosphatidylcholine acyltransferase 2                     | LPCAT2    | 1                                  |
| Lysosomal acid phosphatase                                    | ACP2      | 5                                  |
| Lysosomal alpha-glucosidase                                   | GAA       | 8                                  |
| Lysosome-associated membrane glycoprotein 1                   | LAMP1     | 4                                  |
| Lysosome-associated membrane glycoprotein 2                   | LAMP2     | 3                                  |
| Macrophage migration inhibitory factor                        | MIF       | 2                                  |
| Macrophage-capping protein                                    | CAPG      | 5                                  |
| MAGUK p55 subfamily member 5                                  | MPP5      | 10                                 |

| Protein name                                            | Gene name | Number of unique peptides (seq, z) |
|---------------------------------------------------------|-----------|------------------------------------|
| Malate dehydrogenase, cytoplasmic                       | MDH1      | 10                                 |
| Malate dehydrogenase, mitochondrial                     | MDH2      | 2                                  |
| Maltase-glucoamylase, intestinal                        | MGAM      | 6                                  |
| Maltase-glucoamylase, intestinal                        | MGAM      | 8                                  |
| Mannan-binding lectin serine protease 2                 | MASP2     | 10                                 |
| Mannose-6-phosphate isomerase                           | MPI       | 1                                  |
| Mannosyl-oligosaccharide 1,2- $\alpha$ -mannosidase IA  | MAN1A1    | 6                                  |
| MARCKS-related protein                                  | MARCKSL1  | 1                                  |
| Matrix metalloproteinase-9                              | MMP9      | 1                                  |
| Matrix-remodeling-associated protein 8                  | MXRA8     | 12                                 |
| Megakaryocyte-associated tyrosine-protein kinase        | MATK      | 1                                  |
| Melanotransferrin                                       | MELTF     | 9                                  |
| Merlin                                                  | NF2       | 3                                  |
| Methylthioribose-1-phosphate isomerase                  | MRI1      | 1                                  |
| Mirror-image polydactyly gene 1 protein                 | MIPOL1    | 1                                  |
| MIT domain-containing protein 1                         | MITD1     | 6                                  |
| Mitoguardin 1                                           | MIGA1     | 1                                  |
| Moesin                                                  | MSN       | 32                                 |
| Monocyte differentiation antigen CD14                   | CD14      | 17                                 |
| Mucin-1                                                 | MUC1      | 2                                  |
| Mucin-1                                                 | MUC1      | 7                                  |
| Mucin-1                                                 | MUC1      | 11                                 |
| Mucin-13                                                | MUC13     | 2                                  |
| Mucin-21                                                | MUC21     | 1                                  |
| Mucin-4                                                 | MUC4      | 11                                 |
| Mucin-4                                                 | MUC4      | 12                                 |
| Mucin-5AC (Fragments)                                   | MUC5AC    | 24                                 |
| Mucin-5B                                                | MUC5B     | 50                                 |
| Mucin-6                                                 | MUC6      | 1                                  |
| Mucin-6                                                 | MUC6      | 17                                 |
| Mucin-like protein 1                                    | MUCL1     | 1                                  |
| Mucosal addressin cell adhesion molecule 1              | MADCAM1   | 1                                  |
| Multidrug resistance protein 1                          | ABCB1     | 18                                 |
| Multifunctional protein ADE2                            | PAICS     | 2                                  |
| Multimerin-2                                            | MMRN2     | 2                                  |
| Multiple epidermal growth factor-like domains protein 8 | MEGF8     | 5                                  |
| Multivesicular body subunit 12A                         | MVB12A    | 8                                  |
| Multivesicular body subunit 12B                         | MVB12B    | 1                                  |
| Myeloblastin                                            | PRTN3     | 2                                  |
| Myeloperoxidase                                         | MPO       | 9                                  |
| Myocilin                                                | MYOC      | 1                                  |
| Myoferlin                                               | MYOF      | 7                                  |
| Myoglobin                                               | MB        | 1                                  |
| Myosin light polypeptide 6                              | MYL6      | 2                                  |

| Protein name                                            | Gene name | Number of unique peptides (seq, z) |
|---------------------------------------------------------|-----------|------------------------------------|
| Myosin-9                                                | MYH9      | 11                                 |
| Myotubularin-related protein 14                         | MTMR14    | 1                                  |
| Myristoylated alanine-rich C-kinase substrate           | MARCKS    | 2                                  |
| N(G),N(G)-dimethylarginine dimethylaminohydrolase 1     | DDAH1     | 2                                  |
| N(G),N(G)-dimethylarginine dimethylaminohydrolase 2     | DDAH2     | 11                                 |
| Na(+)/H(+) exchange regulatory cofactor NHE-RF1         | SLC9A3R1  | 11                                 |
| Na(+)/H(+) exchange regulatory cofactor NHE-RF2         | SLC9A3R2  | 6                                  |
| Na(+)/H(+) exchange regulatory cofactor NHE-RF3         | PDZK1     | 5                                  |
| N-acetyl-D-glucosamine kinase                           | NAGK      | 1                                  |
| N-acetylgalactosamine-6-sulfatase                       | GALNS     | 3                                  |
| N-acetylglucosamine-6-sulfatase                         | GNS       | 4                                  |
| N-acetylmuramoyl-L-alanine amidase                      | PGLYRP2   | 14                                 |
| NADH dehydrogenase [ubiquinone] iron-sulfur protein 5   | NDUFS5    | 1                                  |
| Napsin-A                                                | NAPSA     | 5                                  |
| Nck-associated protein 1                                | NCKAP1    | 1                                  |
| Nectin-2 (Fragment)                                     | NECTIN2   | 2                                  |
| Nectin-2                                                | NECTIN2   | 7                                  |
| Nectin-4                                                | NECTIN4   | 3                                  |
| NEDD4-like E3 ubiquitin-protein ligase WWP1             | WWP1      | 1                                  |
| NEDD8                                                   | NEDD8     | 1                                  |
| Nephrin                                                 | NPHS1     | 4                                  |
| Neprilysin                                              | MME       | 28                                 |
| Neural Wiskott-Aldrich syndrome protein                 | WASL      | 3                                  |
| Neuroblast differentiation-associated protein AHNAK     | AHNAK     | 12                                 |
| Neurofascin                                             | NFASC     | 1                                  |
| Neurofibromin                                           | NF1       | 1                                  |
| Neuroigin-3                                             | NLGN3     | 1                                  |
| Neurosecretory protein VGF                              | VGF       | 1                                  |
| Neutral and basic amino acid transport protein rBAT     | SLC3A1    | 1                                  |
| Neutrophil elastase                                     | ELANE     | 3                                  |
| Neutrophil gelatinase-associated lipocalin              | LCN2      | 2                                  |
| NF-X1-type zinc finger protein NFXL1                    | NFXL1     | 1                                  |
| Niban-like protein 1                                    | FAM129B   | 4                                  |
| Nicastrin                                               | NCSTN     | 1                                  |
| Nicotinate phosphoribosyltransferase                    | NAPRT     | 3                                  |
| Nicotinate-nucleotide pyrophosphorylase [carboxylating] | QPRT      | 4                                  |
| Nidogen-1                                               | NID1      | 9                                  |
| Nitric oxide synthase, inducible                        | NOS2      | 1                                  |
| Nitrilase homolog 1                                     | NIT1      | 1                                  |
| Non-secretory ribonuclease                              | RNASE2    | 1                                  |
| Nuclear transport factor 2                              | NUTF2     | 2                                  |
| Nucleobindin-1                                          | NUCB1     | 3                                  |
| Nucleolar pre-ribosomal-associated protein 1            | URB1      | 1                                  |
| Nucleoside diphosphate kinase B                         | NME2      | 1                                  |

| Protein name                                                     | Gene name | Number of unique peptides (seq, z) |
|------------------------------------------------------------------|-----------|------------------------------------|
| Nucleoside diphosphate kinase                                    | NME1-NME2 | 1                                  |
| Olfactomedin-4                                                   | OLFM4     | 19                                 |
| Omega-amidase NIT2                                               | NIT2      | 2                                  |
| Osteoclast-associated immunoglobulin-like receptor               | OSCAR     | 4                                  |
| Osteoclast-associated immunoglobulin-like receptor               | OSCAR     | 4                                  |
| Osteoclast-stimulating factor 1                                  | OSTF1     | 2                                  |
| Oxidoreductase NAD-binding domain-containing protein 1           | OXNAD1    | 1                                  |
| Pancreatic alpha-amylase                                         | AMY2A     | 4                                  |
| Pantetheinase                                                    | VNN1      | 1                                  |
| Parathyroid hormone/parathyroid hormone-related peptide receptor | PTH1R     | 1                                  |
| Partitioning defective 3 homolog B                               | PARD3B    | 1                                  |
| Partitioning defective 6 homolog beta                            | PARD6B    | 2                                  |
| PDZ domain-containing protein GIPC1                              | GIPC1     | 4                                  |
| Peflin                                                           | PEF1      | 5                                  |
| Pendrin                                                          | SLC26A4   | 1                                  |
| Peptidase inhibitor 16                                           | PI16      | 1                                  |
| Peptidoglycan recognition protein 1                              | PGLYRP1   | 7                                  |
| Peptidyl-glycine alpha-amidating monooxygenase                   | PAM       | 1                                  |
| Peptidyl-prolyl cis-trans isomerase A                            | PPIA      | 17                                 |
| Peptidyl-prolyl cis-trans isomerase B                            | PPIB      | 1                                  |
| Peptidyl-prolyl cis-trans isomerase FKBP1A                       | FKBP1A    | 1                                  |
| Periplakin                                                       | PPL       | 29                                 |
| Peroxiredoxin-1                                                  | PRDX1     | 6                                  |
| Peroxiredoxin-2                                                  | PRDX2     | 13                                 |
| Peroxiredoxin-5, mitochondrial                                   | PRDX5     | 2                                  |
| Peroxiredoxin-6                                                  | PRDX6     | 7                                  |
| Phosphatase and actin regulator 4                                | PHACTR4   | 1                                  |
| Phosphatidylcholine-sterol acyltransferase                       | LCAT      | 3                                  |
| Phosphatidylethanolamine-binding protein 1                       | PEBP1     | 17                                 |
| Phosphoacetylglucosamine mutase                                  | PGM3      | 1                                  |
| Phosphoenolpyruvate carboxykinase, cytosolic [GTP]               | PCK1      | 1                                  |
| Phosphoglucomutase-1                                             | PGM1      | 2                                  |
| Phosphoglycerate kinase 1                                        | PGK1      | 22                                 |
| Phosphoglycerate mutase 1                                        | PGAM1     | 7                                  |
| Phospholipase D3                                                 | PLD3      | 1                                  |
| Phospholipid hydroperoxide glutathione peroxidase, mitochondrial | GPX4      | 1                                  |
| Phospholipid scramblase 1                                        | PLSCR1    | 7                                  |
| Phospholipid scramblase 3                                        | PLSCR3    | 1                                  |
| Phospholipid-transporting ATPase IC                              | ATP8B1    | 1                                  |
| Phosphotriesterase-related protein                               | PTER      | 2                                  |
| Pigment epithelium-derived factor                                | SERPINF1  | 9                                  |

| Protein name                                                    | Gene name | Number of unique peptides (seq, z) |
|-----------------------------------------------------------------|-----------|------------------------------------|
| Pituitary tumor-transforming gene 1 protein-interacting protein | PTTG1IP   | 2                                  |
| Plakophilin-1                                                   | PKP1      | 2                                  |
| Plasma protease C1 inhibitor                                    | SERPING1  | 7                                  |
| Plasma serine protease inhibitor                                | SERPINA5  | 10                                 |
| Plasminogen                                                     | PLG       | 16                                 |
| Plastin-1                                                       | PLS1      | 3                                  |
| Plastin-2                                                       | LCP1      | 2                                  |
| Plastin-3                                                       | PLS3      | 6                                  |
| Platelet glycoprotein Ib alpha chain                            | GP1BA     | 1                                  |
| Platelet-activating factor acetylhydrolase IB subunit beta      | PAFAH1B2  | 1                                  |
| Platelet-activating factor acetylhydrolase IB subunit gamma     | PAFAH1B3  | 1                                  |
| Platelet-derived growth factor receptor beta                    | PDGFRB    | 5                                  |
| Pleckstrin homology domain-containing family A member 1         | PLEKHA1   | 1                                  |
| Pleckstrin homology domain-containing family B member 2         | PLEKHB2   | 1                                  |
| Pleckstrin homology domain-containing family F member 2         | PLEKHF2   | 1                                  |
| Plectin                                                         | PLEC      | 1                                  |
| Plexin-B2                                                       | PLXNB2    | 1                                  |
| Podocalyxin                                                     | PODXL     | 11                                 |
| Podocin                                                         | NPHS2     | 4                                  |
| Poly(rC)-binding protein 1                                      | PCBP1     | 6                                  |
| Polycystin-2                                                    | PKD2      | 1                                  |
| Polymeric immunoglobulin receptor                               | PIGR      | 24                                 |
| Potassium-transporting ATPase alpha chain 2                     | ATP12A    | 2                                  |
| Probable hydrolase PNKD                                         | PNKD      | 1                                  |
| Probable serine carboxypeptidase CPVL                           | CPVL      | 2                                  |
| Probable Xaa-Pro aminopeptidase 3                               | XPNPEP3   | 1                                  |
| Procollagen C-endopeptidase enhancer 1                          | PCOLCE    | 1                                  |
| Procollagen-lysine,2-oxoglutarate 5-dioxygenase 3               | PLOD3     | 1                                  |
| Pro-epidermal growth factor                                     | EGF       | 24                                 |
| Profilin                                                        | PFN2      | 2                                  |
| Profilin-1                                                      | PFN1      | 8                                  |
| Profilin-2                                                      | PFN2      | 2                                  |
| Programmed cell death 6-interacting protein                     | PDCD6IP   | 55                                 |
| Programmed cell death protein 10                                | PDCD10    | 2                                  |
| Programmed cell death protein 6                                 | PDCD6     | 9                                  |
| Prolactin-inducible protein                                     | PIP       | 4                                  |
| Prominin-1                                                      | PROM1     | 32                                 |
| Prominin-2                                                      | PROM2     | 15                                 |
| Prosaposin                                                      | PSAP      | 1                                  |
| Prosaposin                                                      | PSAP      | 4                                  |
| Prostaglandin reductase 1                                       | PTGR1     | 9                                  |
| Prostaglandin-H2 D-isomerase                                    | PTGDS     | 3                                  |
| Prostamide/prostaglandin F synthase                             | FAM213B   | 2                                  |

| Protein name                                                      | Gene name  | Number of unique peptides (seq, z) |
|-------------------------------------------------------------------|------------|------------------------------------|
| Prostasin                                                         | PRSS8      | 1                                  |
| Prostate stem cell antigen                                        | PSCA       | 4                                  |
| Prostate-specific antigen (Fragment)                              | KLK3       | 1                                  |
| Prostate-specific antigen                                         | KLK3       | 5                                  |
| Prostatic acid phosphatase                                        | ACPP       | 12                                 |
| Proteasome activator complex subunit 1                            | PSME1      | 3                                  |
| Proteasome activator complex subunit 2                            | PSME2      | 2                                  |
| Proteasome subunit alpha type-1                                   | PSMA1      | 1                                  |
| Proteasome subunit alpha type-2                                   | PSMA2      | 1                                  |
| Proteasome subunit alpha type-5                                   | PSMA5      | 2                                  |
| Proteasome subunit alpha type-6                                   | PSMA6      | 1                                  |
| Proteasome subunit beta type-2                                    | PSMB2      | 1                                  |
| Proteasome subunit beta type-6                                    | PSMB6      | 1                                  |
| Protein AMBP                                                      | AMBP       | 15                                 |
| Protein AMBP                                                      | AMBP       | 1                                  |
| Protein ARPC4-TTL3                                                | ARPC4-TTL3 | 1                                  |
| Protein crumbs homolog 2                                          | CRB2       | 8                                  |
| Protein crumbs homolog 3                                          | CRB3       | 1                                  |
| Protein CutA                                                      | CUTA       | 2                                  |
| Protein DJ-1                                                      | PARK7      | 7                                  |
| Protein dopey-2                                                   | DOPEY2     | 1                                  |
| Protein FAM151A                                                   | FAM151A    | 1                                  |
| Protein FAM177A1                                                  | FAM177A1   | 1                                  |
| Protein FAM63A                                                    | FAM63A     | 3                                  |
| Protein FAM65A                                                    | FAM65A     | 2                                  |
| Protein KIAA0100                                                  | KIAA0100   | 1                                  |
| Protein kinase C alpha type                                       | PRKCA      | 2                                  |
| Protein kinase C and casein kinase substrate in neurons protein 2 | PACSIN2    | 6                                  |
| Protein kinase C and casein kinase substrate in neurons protein 3 | PACSIN3    | 11                                 |
| Protein kinase C zeta type                                        | PRKCZ      | 1                                  |
| Protein lifeguard 3                                               | TMBIM1     | 3                                  |
| Protein lin-7 homolog C                                           | LIN7C      | 3                                  |
| Protein MAL2                                                      | MAL2       | 1                                  |
| Protein NDRG1                                                     | NDRG1      | 2                                  |
| Protein phosphatase 1 regulatory subunit 16A                      | PPP1R16A   | 1                                  |
| Protein phosphatase methylesterase 1                              | PPME1      | 1                                  |
| Protein phosphatase Slingshot homolog 1                           | SSH1       | 2                                  |
| Protein S100-A10                                                  | S100A10    | 1                                  |
| Protein S100-A11                                                  | S100A11    | 6                                  |
| Protein S100-A12                                                  | S100A12    | 1                                  |
| Protein S100-A14                                                  | S100A14    | 4                                  |
| Protein S100-A16                                                  | S100A16    | 4                                  |

| Protein name                                            | Gene name  | Number of unique peptides (seq, z) |
|---------------------------------------------------------|------------|------------------------------------|
| Protein S100-A4                                         | S100A4     | 1                                  |
| Protein S100-A6                                         | S100A6     | 1                                  |
| Protein S100-A7                                         | S100A7     | 1                                  |
| Protein S100-A8                                         | S100A8     | 4                                  |
| Protein S100-A9                                         | S100A9     | 10                                 |
| Protein S100-P                                          | S100P      | 4                                  |
| Protein SON                                             | SON        | 1                                  |
| Protein stum homolog                                    | C1orf95    | 1                                  |
| Protein tweety homolog 3                                | TTYH3      | 1                                  |
| Protein tyrosine phosphatase type IVA 1                 | PTP4A1     | 1                                  |
| Protein XRP2                                            | RP2        | 2                                  |
| Protein-glutamine gamma-glutamyltransferase 2           | TGM2       | 2                                  |
| Protein-glutamine gamma-glutamyltransferase 4           | TGM4       | 8                                  |
| Protein-glutamine gamma-glutamyltransferase E           | TGM3       | 2                                  |
| Protein-L-isoaspartate(D-aspartate) O-methyltransferase | PCMT1      | 1                                  |
| Prothrombin                                             | F2         | 11                                 |
| Protocadherin gamma-B4                                  | PCDHGB4    | 1                                  |
| Protocadherin gamma-C3                                  | PCDHGC3    | 2                                  |
| Protocadherin-1                                         | PCDH1      | 2                                  |
| Protocadherin-12                                        | PCDH12     | 2                                  |
| Proto-oncogene tyrosine-protein kinase Src              | SRC        | 2                                  |
| Purine nucleoside phosphorylase                         | PNP        | 1                                  |
| Puromycin-sensitive aminopeptidase                      | NPEPPS     | 3                                  |
| Putative ankyrin repeat domain-containing protein 31    | ANKRD31    | 1                                  |
| Putative keratin-87 protein                             | KRT87P     | 1                                  |
| Putative uncharacterized protein encoded by CACTIN-AS1  | CACTIN-AS1 | 1                                  |
| Pyridoxal kinase                                        | PDXK       | 3                                  |
| Pyridoxine-5'-phosphate oxidase                         | PNPO       | 1                                  |
| Pyruvate kinase PKLR                                    | PKLR       | 1                                  |
| Pyruvate kinase PKM                                     | PKM        | 18                                 |
| Quinone oxidoreductase                                  | CRYZ       | 5                                  |
| Rab GDP dissociation inhibitor beta                     | GDI2       | 5                                  |
| Rab11 family-interacting protein 1                      | RAB11FIP1  | 1                                  |
| Rab11 family-interacting protein 4                      | RAB11FIP4  | 1                                  |
| Rab11 family-interacting protein 5                      | RAB11FIP5  | 1                                  |
| Rab11 family-interacting protein 5                      | RAB11FIP5  | 1                                  |
| Radixin                                                 | RDX        | 17                                 |
| Ragulator complex protein LAMTOR1                       | LAMTOR1    | 1                                  |
| Rap guanine nucleotide exchange factor 3                | RAPGEF3    | 5                                  |
| Ras GTPase-activating-like protein IQGAP1               | IQGAP1     | 16                                 |
| Ras-related C3 botulinum toxin substrate 1              | RAC1       | 1                                  |
| Ras-related protein Rab-10                              | RAB10      | 2                                  |
| Ras-related protein Rab-13                              | RAB13      | 1                                  |
| Ras-related protein Rab-14                              | RAB14      | 2                                  |

| Protein name                                   | Gene name | Number of unique peptides (seq, z) |
|------------------------------------------------|-----------|------------------------------------|
| Ras-related protein Rab-15                     | RAB15     | 1                                  |
| Ras-related protein Rab-17                     | RAB17     | 1                                  |
| Ras-related protein Rab-1A                     | RAB1A     | 2                                  |
| Ras-related protein Rab-21                     | RAB21     | 1                                  |
| Ras-related protein Rab-22A                    | RAB22A    | 1                                  |
| Ras-related protein Rab-25                     | RAB25     | 2                                  |
| Ras-related protein Rab-27A                    | RAB27A    | 3                                  |
| Ras-related protein Rab-27B                    | RAB27B    | 2                                  |
| Ras-related protein Rab-2A                     | RAB2A     | 2                                  |
| Ras-related protein Rab-33B                    | RAB33B    | 2                                  |
| Ras-related protein Rab-35                     | RAB35     | 2                                  |
| Ras-related protein Rab-3B                     | RAB3B     | 3                                  |
| Ras-related protein Rab-3D                     | RAB3D     | 2                                  |
| Ras-related protein Rab-5B                     | RAB5B     | 2                                  |
| Ras-related protein Rab-5C                     | RAB5C     | 5                                  |
| Ras-related protein Rab-7a                     | RAB7A     | 11                                 |
| Ras-related protein Rab-8A                     | RAB8A     | 4                                  |
| Ras-related protein Rab-8B                     | RAB8B     | 3                                  |
| Ras-related protein Ral-A                      | RALA      | 3                                  |
| Ras-related protein Ral-B                      | RALB      | 3                                  |
| Ras-related protein Rap-1A                     | RAP1A     | 1                                  |
| Ras-related protein Rap-2b                     | RAP2B     | 1                                  |
| Ras-related protein Rap-2c                     | RAP2C     | 1                                  |
| Ras-related protein R-Ras                      | RRAS      | 4                                  |
| Ras-related protein R-Ras2                     | RRAS2     | 1                                  |
| Receptor-type tyrosine-protein phosphatase eta | PTPRJ     | 16                                 |
| Receptor-type tyrosine-protein phosphatase O   | PTPRO     | 5                                  |
| Renin receptor                                 | ATP6AP2   | 2                                  |
| Resistin                                       | RETN      | 3                                  |
| Reticulon-4 receptor-like 2                    | RTN4RL2   | 1                                  |
| Retinal dehydrogenase 1                        | ALDH1A1   | 9                                  |
| Retinoic acid-induced protein 3                | GPRC5A    | 6                                  |
| Retinol-binding protein 4                      | RBP4      | 1                                  |
| Retinol-binding protein 5                      | RBP5      | 1                                  |
| Rho GDP-dissociation inhibitor 1 (Fragment)    | ARHGDIA   | 2                                  |
| Rho GDP-dissociation inhibitor 1               | ARHGDIA   | 1                                  |
| Rho GDP-dissociation inhibitor 1               | ARHGDIA   | 6                                  |
| Rho GDP-dissociation inhibitor 2               | ARHGDIB   | 1                                  |
| Rho GTPase-activating protein 18               | ARHGAP18  | 6                                  |
| Rhopilin-2                                     | RHPN2     | 1                                  |
| Rho-related GTP-binding protein RhoB           | RHOB      | 2                                  |
| Rho-related GTP-binding protein RhoC           | RHOC      | 2                                  |
| Rho-related GTP-binding protein RhoF           | RHOF      | 5                                  |
| Rho-related GTP-binding protein RhoG           | RHOG      | 5                                  |



| Protein name                                                                      | Gene name | Number of unique peptides (seq, z) |
|-----------------------------------------------------------------------------------|-----------|------------------------------------|
| Ribonuclease inhibitor                                                            | RNH1      | 7                                  |
| Ribonuclease UK114                                                                | HRSP12    | 1                                  |
| RILP-like protein 2                                                               | RILPL2    | 1                                  |
| RNA polymerase II elongation factor ELL3                                          | ELL3      | 1                                  |
| Roundabout homolog 4                                                              | ROBO4     | 10                                 |
| Secreted and transmembrane protein 1                                              | SECTM1    | 3                                  |
| Secretory carrier-associated membrane protein 2                                   | SCAMP2    | 1                                  |
| Secretory phospholipase A2 receptor                                               | PLA2R1    | 1                                  |
| Selenium-binding protein 1                                                        | SELENBP1  | 5                                  |
| Semaphorin-3G                                                                     | SEMA3G    | 1                                  |
| Semaphorin-5A                                                                     | SEMA5A    | 3                                  |
| Semenogelin-1                                                                     | SEMG1     | 3                                  |
| Semenogelin-2                                                                     | SEMG2     | 4                                  |
| Septapterin reductase                                                             | SPR       | 2                                  |
| Septin-2                                                                          | SEPT2     | 3                                  |
| Serine hydroxymethyltransferase, cytosolic                                        | SHMT1     | 5                                  |
| Serine incorporator 5                                                             | SERINC5   | 1                                  |
| Serine protease hepsin                                                            | HPN       | 4                                  |
| Serine/threonine-protein kinase 24                                                | STK24     | 8                                  |
| Serine/threonine-protein kinase 25                                                | STK25     | 2                                  |
| Serine/threonine-protein kinase 26                                                | STK26     | 1                                  |
| Serine/threonine-protein kinase ATR                                               | ATR       | 1                                  |
| Serine/threonine-protein kinase H1                                                | PSKH1     | 1                                  |
| Serine/threonine-protein kinase N2                                                | PKN2      | 1                                  |
| Serine/threonine-protein kinase PAK 4                                             | PAK4      | 3                                  |
| Serine/threonine-protein kinase TAO1                                              | TAOK1     | 2                                  |
| Serine/threonine-protein kinase TAO3                                              | TAOK3     | 2                                  |
| Serine/threonine-protein kinase ULK3                                              | ULK3      | 3                                  |
| Serine/threonine-protein phosphatase 2A 65 kDa regulatory subunit A alpha isoform | PPP2R1A   | 1                                  |
| Serine/threonine-protein phosphatase PP1-alpha catalytic subunit                  | PPP1CA    | 1                                  |
| Serine/threonine-protein phosphatase PP1-beta catalytic subunit                   | PPP1CB    | 1                                  |
| Serine--tRNA ligase, cytoplasmic                                                  | SARS      | 1                                  |
| Serotransferrin                                                                   | TF        | 63                                 |
| Serpin B3                                                                         | SERPINB3  | 3                                  |
| Serpin B6                                                                         | SERPINB6  | 1                                  |
| Serpin B6                                                                         | SERPINB6  | 3                                  |
| Serum albumin                                                                     | ALB       | 56                                 |
| Sex hormone-binding globulin                                                      | SHBG      | 1                                  |
| S-formylglutathione hydrolase                                                     | ESD       | 4                                  |
| SH3 and multiple ankyrin repeat domains protein 2                                 | SHANK2    | 1                                  |
| SH3 domain-binding glutamic acid-rich-like protein                                | SH3BGRL   | 1                                  |

| Protein name                                                      | Gene name | Number of unique peptides (seq, z) |
|-------------------------------------------------------------------|-----------|------------------------------------|
| SH3 domain-binding protein 4                                      | SH3BP4    | 4                                  |
| Sialate O-acetyltransferase                                       | SIAE      | 1                                  |
| Sialic acid synthase                                              | NANS      | 2                                  |
| Sialidase-1                                                       | NEU1      | 1                                  |
| Signal transducer and activator of transcription 1-alpha/beta     | STAT1     | 2                                  |
| Small integral membrane protein 22                                | SMIM22    | 2                                  |
| Small integral membrane protein 24                                | SMIM24    | 1                                  |
| Small integral membrane protein 5                                 | SMIM5     | 1                                  |
| Small proline-rich protein 3                                      | SPRR3     | 10                                 |
| Small VCP/p97-interacting protein                                 | SVIP      | 1                                  |
| Smoothed homolog                                                  | SMO       | 2                                  |
| Sodium channel protein type 4 subunit alpha                       | SCN4A     | 1                                  |
| Sodium/potassium-transporting ATPase subunit alpha-1              | ATP1A1    | 10                                 |
| Sodium/potassium-transporting ATPase subunit beta-1               | ATP1B1    | 5                                  |
| Sodium-dependent neutral amino acid transporter B(0)AT1           | SLC6A19   | 2                                  |
| Solute carrier family 12 member 1 (Fragment)                      | SLC12A1   | 3                                  |
| Solute carrier family 12 member 1                                 | SLC12A1   | 26                                 |
| Solute carrier family 12 member 3                                 | SLC12A3   | 6                                  |
| Solute carrier family 2, facilitated glucose transporter member 5 | SLC2A5    | 2                                  |
| Solute carrier family 22 member 2                                 | SLC22A2   | 1                                  |
| Sorbitol dehydrogenase                                            | SORD      | 9                                  |
| Sorcin                                                            | SRI       | 10                                 |
| Sorting and assembly machinery component 50 homolog               | SAMM50    | 1                                  |
| Sorting nexin-18                                                  | SNX18     | 7                                  |
| Sorting nexin-33                                                  | SNX33     | 1                                  |
| SPARC-like protein 1                                              | SPARCL1   | 1                                  |
| Spastin                                                           | SPAST     | 1                                  |
| Specifically androgen-regulated gene protein                      | SARG      | 16                                 |
| Sperm flagellar protein 2                                         | SPEF2     | 1                                  |
| Sperm-associated antigen 16 protein                               | SPAG16    | 1                                  |
| SPRY domain-containing SOCS box protein 3                         | SPSB3     | 1                                  |
| Src substrate cortactin                                           | CTTN      | 2                                  |
| STAM-binding protein                                              | STAMBP    | 2                                  |
| STE20/SPS1-related proline-alanine-rich protein kinase            | STK39     | 1                                  |
| STE20-like serine/threonine-protein kinase                        | SLK       | 9                                  |
| Stomatin-like protein 3                                           | STOML3    | 1                                  |
| Stress-induced-phosphoprotein 1                                   | STIP1     | 1                                  |
| Structural maintenance of chromosomes protein 3                   | SMC3      | 1                                  |
| Submaxillary gland androgen-regulated protein 3B                  | SMR3B     | 1                                  |
| Sulfhydryl oxidase 1                                              | QSOX1     | 2                                  |
| Superoxide dismutase [Cu-Zn]                                      | SOD1      | 2                                  |
| Sushi domain-containing protein 2                                 | SUSD2     | 2                                  |
| Synaptic vesicle membrane protein VAT-1 homolog                   | VAT1      | 4                                  |

| Protein name                                                             | Gene name | Number of unique peptides (seq, z) |
|--------------------------------------------------------------------------|-----------|------------------------------------|
| Synaptosomal-associated protein 23                                       | SNAP23    | 6                                  |
| Synaptosomal-associated protein 29                                       | SNAP29    | 1                                  |
| Synaptotagmin-7                                                          | SYT7      | 1                                  |
| Synaptotagmin-like protein 1                                             | SYTL1     | 1                                  |
| Synaptotagmin-like protein 2                                             | SYTL2     | 1                                  |
| Synaptotagmin-like protein 2                                             | SYTL2     | 4                                  |
| Synaptotagmin-like protein 4                                             | SYTL4     | 1                                  |
| Syndecan binding protein (Syntenin), isoform CRA_a                       | SDCBP     | 23                                 |
| Syntaxin-3                                                               | STX3      | 3                                  |
| Syntaxin-7                                                               | STX7      | 2                                  |
| Syntaxin-binding protein 1                                               | STXBP1    | 2                                  |
| Syntaxin-binding protein 2                                               | STXBP2    | 10                                 |
| Syntaxin-binding protein 4                                               | STXBP4    | 3                                  |
| Syntenin-1                                                               | SDCBP     | 24                                 |
| Syntenin-2                                                               | SDCBP2    | 5                                  |
| Talin-1                                                                  | TLN1      | 3                                  |
| Tandem C2 domains nuclear protein                                        | TC2N      | 2                                  |
| Target of Myb protein 1                                                  | TOM1      | 2                                  |
| TBC1 domain family member 10A                                            | TBC1D10A  | 1                                  |
| TBC1 domain family member 24                                             | TBC1D24   | 1                                  |
| T-complex protein 1 subunit beta                                         | CCT2      | 1                                  |
| T-complex protein 1 subunit epsilon                                      | CCT5      | 2                                  |
| T-complex protein 1 subunit eta                                          | CCT7      | 1                                  |
| T-complex protein 1 subunit gamma                                        | CCT3      | 2                                  |
| Tenascin-X                                                               | TNXB      | 1                                  |
| Tenascin-X                                                               | TNXB      | 1                                  |
| Teneurin-3                                                               | TENM3     | 1                                  |
| Tetranectin                                                              | CLEC3B    | 1                                  |
| Tetraspanin (Fragment)                                                   | CD9       | 2                                  |
| Tetraspanin-1                                                            | TSPAN1    | 4                                  |
| Tetraspanin-8                                                            | TSPAN8    | 1                                  |
| Thioredoxin domain-containing protein 17                                 | TXNDC17   | 2                                  |
| Thioredoxin                                                              | TXN       | 2                                  |
| Thioredoxin-like protein 1                                               | TXNL1     | 1                                  |
| Thiosulfate sulfurtransferase/rhodanese-like domain-containing protein 1 | TSTD1     | 1                                  |
| Thrombospondin-3                                                         | THBS3     | 1                                  |
| Thy-1 membrane glycoprotein                                              | THY1      | 3                                  |
| Thymosin beta-4                                                          | TMSB4X    | 1                                  |
| Thyroxine-binding globulin                                               | SERPINA7  | 4                                  |
| Tissue factor                                                            | F3        | 1                                  |
| Toll-interacting protein                                                 | TOLLIP    | 3                                  |
| TOM1-like protein 1                                                      | TOM1L1    | 1                                  |
| TOM1-like protein 2                                                      | TOM1L2    | 4                                  |

| Protein name                                                     | Gene name | Number of unique peptides (seq, z) |
|------------------------------------------------------------------|-----------|------------------------------------|
| Transaldolase                                                    | TALDO1    | 3                                  |
| Transcription factor AP-2-delta                                  | TFAP2D    | 1                                  |
| Transforming growth factor beta receptor type 3                  | TGFBR3    | 1                                  |
| Transforming protein RhoA                                        | RHOA      | 2                                  |
| Transgelin-2                                                     | TAGLN2    | 3                                  |
| Transient receptor potential cation channel subfamily V member 5 | TRPV5     | 1                                  |
| Transitional endoplasmic reticulum ATPase                        | VCP       | 1                                  |
| Transketolase                                                    | TKT       | 3                                  |
| Translationally-controlled tumor protein                         | TPT1      | 1                                  |
| Transmembrane 9 superfamily member                               | N/A       | 1                                  |
| Transmembrane channel-like protein 5                             | TMC5      | 3                                  |
| Transmembrane protease serine 11B                                | TMPRSS11B | 1                                  |
| Transmembrane protease serine 2                                  | TMPRSS2   | 7                                  |
| Transmembrane protein 201                                        | TMEM201   | 1                                  |
| Transmembrane protein 8A                                         | TMEM8A    | 1                                  |
| Transthyretin                                                    | TTR       | 2                                  |
| Transthyretin                                                    | TTR       | 10                                 |
| Trefoil factor 2                                                 | TFF2      | 1                                  |
| Trehalase                                                        | TREH      | 1                                  |
| Trifunctional purine biosynthetic protein adenosine-3            | GART      | 1                                  |
| Triokinase/FMN cyclase                                           | TKFC      | 5                                  |
| Triosephosphate isomerase                                        | TPI1      | 23                                 |
| Tripartite motif-containing protein 47                           | TRIM47    | 1                                  |
| Tripeptidyl-peptidase 1                                          | TPP1      | 7                                  |
| Tropomyosin alpha-4 chain                                        | TPM4      | 1                                  |
| Troponin T, slow skeletal muscle                                 | TNNT1     | 1                                  |
| Tryptophan--tRNA ligase, cytoplasmic                             | WARS      | 1                                  |
| Tubulin alpha-4A chain                                           | TUBA4A    | 2                                  |
| Tubulin beta chain                                               | TUBB      | 1                                  |
| Tubulin beta-4A chain                                            | TUBB4A    | 1                                  |
| Tubulin beta-4B chain                                            | TUBB4B    | 2                                  |
| Tubulin polymerization-promoting protein family member 3         | TPPP3     | 1                                  |
| Tumor necrosis factor alpha-induced protein 2                    | TNFAIP2   | 2                                  |
| Tumor necrosis factor receptor superfamily member 19L            | RELT      | 1                                  |
| Tumor susceptibility gene 101 protein                            | TSG101    | 16                                 |
| Tumor-associated calcium signal transducer 2                     | TACSTD2   | 2                                  |
| Type I inositol 1,4,5-trisphosphate 5-phosphatase                | INPP5A    | 1                                  |
| Tyrosine-protein kinase FRK                                      | FRK       | 14                                 |
| Tyrosine-protein kinase Lyn                                      | LYN       | 5                                  |
| Tyrosine-protein kinase                                          | YES1      | 1                                  |
| Tyrosine-protein kinase receptor UFO                             | AXL       | 2                                  |
| Tyrosine-protein kinase Yes                                      | YES1      | 6                                  |

| Protein name                                                   | Gene name | Number of unique peptides (seq, z) |
|----------------------------------------------------------------|-----------|------------------------------------|
| Tyrosine-protein phosphatase non-receptor type 13              | PTPN13    | 16                                 |
| Tyrosine-protein phosphatase non-receptor type 6               | PTPN6     | 1                                  |
| Ubiquitin carboxyl-terminal hydrolase 5                        | USP5      | 1                                  |
| Ubiquitin carboxyl-terminal hydrolase isozyme L1               | UCHL1     | 4                                  |
| Ubiquitin carboxyl-terminal hydrolase isozyme L3               | UCHL3     | 1                                  |
| Ubiquitin carboxyl-terminal hydrolase                          | UCHL1     | 1                                  |
| Ubiquitin domain-containing protein 1                          | UBTD1     | 1                                  |
| Ubiquitin-conjugating enzyme E2 variant 3                      | UEVLD     | 4                                  |
| Ubiquitin-fold modifier-conjugating enzyme 1                   | UFC1      | 1                                  |
| Ubiquitin-like modifier-activating enzyme 1                    | UBA1      | 14                                 |
| Ubiquitin-like protein 3                                       | UBL3      | 1                                  |
| UBX domain-containing protein 6                                | UBXN6     | 3                                  |
| UMP-CMP kinase                                                 | CMPK1     | 5                                  |
| Uncharacterized protein C11orf52                               | C11orf52  | 7                                  |
| Uncharacterized protein C4orf19                                | C4orf19   | 1                                  |
| Uncharacterized protein C6orf132                               | C6orf132  | 1                                  |
| Uncharacterized protein C9orf66                                | C9orf66   | 1                                  |
| Uncharacterized protein KIAA1522                               | KIAA1522  | 2                                  |
| Unconventional myosin-Ib                                       | MYO1B     | 11                                 |
| Unconventional myosin-Ic                                       | MYO1C     | 46                                 |
| Unconventional myosin-Id                                       | MYO1D     | 10                                 |
| Unconventional myosin-Ie                                       | MYO1E     | 1                                  |
| Unconventional myosin-VI                                       | MYO6      | 4                                  |
| Unconventional myosin-VI                                       | MYO6      | 7                                  |
| Urokinase-type plasminogen activator                           | PLAU      | 1                                  |
| Uromodulin (Fragment)                                          | UMOD      | 1                                  |
| Uromodulin                                                     | UMOD      | 40                                 |
| Uroplakin-1a                                                   | UPK1A     | 9                                  |
| Uroplakin-1b                                                   | UPK1B     | 1                                  |
| Uroplakin-2                                                    | UPK2      | 5                                  |
| Uroplakin-3a                                                   | UPK3A     | 7                                  |
| Uroplakin-3b                                                   | UPK3B     | 1                                  |
| USP6 N-terminal-like protein                                   | USP6NL    | 1                                  |
| USP6 N-terminal-like protein                                   | USP6NL    | 1                                  |
| UTP--glucose-1-phosphate uridylyltransferase                   | UGP2      | 1                                  |
| UV excision repair protein RAD23 homolog B                     | RAD23B    | 1                                  |
| Uveal autoantigen with coiled-coil domains and ankyrin repeats | UACA      | 1                                  |
| Vacuolar protein sorting-associated protein 28 homolog         | VPS28     | 4                                  |
| Vacuolar protein sorting-associated protein 29                 | VPS29     | 1                                  |
| Vacuolar protein sorting-associated protein 35                 | VPS35     | 1                                  |
| Vacuolar protein sorting-associated protein 37B                | VPS37B    | 7                                  |
| Vacuolar protein sorting-associated protein 37C                | VPS37C    | 1                                  |
| Vacuolar protein sorting-associated protein 37D                | VPS37D    | 11                                 |

| Protein name                                              | Gene name | Number of unique peptides (seq, z) |
|-----------------------------------------------------------|-----------|------------------------------------|
| Vacuolar protein sorting-associated protein 4A            | VPS4A     | 13                                 |
| Vacuolar protein sorting-associated protein 4B            | VPS4B     | 17                                 |
| Vacuolar protein sorting-associated protein VTA1 homolog  | VTA1      | 5                                  |
| Vacuolar protein-sorting-associated protein 25            | VPS25     | 3                                  |
| Vacuolar protein-sorting-associated protein 36            | VPS36     | 2                                  |
| Vascular cell adhesion protein 1                          | VCAM1     | 1                                  |
| Vasorin                                                   | VASN      | 20                                 |
| Versican core protein (Fragment)                          | VCAN      | 7                                  |
| Versican core protein                                     | VCAN      | 7                                  |
| Vesicle-fusing ATPase                                     | NSF       | 2                                  |
| Vesicular integral-membrane protein VIP36                 | LMAN2     | 13                                 |
| Villin-1                                                  | VIL1      | 4                                  |
| Villin-like protein                                       | VILL      | 1                                  |
| Vinculin                                                  | VCL       | 5                                  |
| Vitamin D-binding protein                                 | GC        | 1                                  |
| Vitamin D-binding protein                                 | GC        | 5                                  |
| Vitamin K-dependent protein Z                             | PROZ      | 2                                  |
| Vitellogenesis membrane outer layer protein 1 homolog     | VMO1      | 3                                  |
| Vitronectin                                               | VTN       | 5                                  |
| Voltage-dependent anion-selective channel protein 1       | VDAC1     | 4                                  |
| Voltage-dependent anion-selective channel protein 3       | VDAC3     | 1                                  |
| Voltage-dependent calcium channel subunit alpha-2/delta-1 | CACNA2D1  | 5                                  |
| VPS9 domain-containing protein 1                          | VPS9D1    | 1                                  |
| V-set domain-containing T-cell activation inhibitor 1     | VTCN1     | 1                                  |
| V-type proton ATPase 116 kDa subunit a isoform 4          | ATP6V0A4  | 2                                  |
| V-type proton ATPase catalytic subunit A                  | ATP6V1A   | 16                                 |
| V-type proton ATPase subunit B, brain isoform             | ATP6V1B2  | 2                                  |
| V-type proton ATPase subunit B, kidney isoform            | ATP6V1B1  | 6                                  |
| V-type proton ATPase subunit d 1                          | ATP6V0D1  | 2                                  |
| V-type proton ATPase subunit E 1                          | ATP6V1E1  | 3                                  |
| V-type proton ATPase subunit G 1                          | ATP6V1G1  | 1                                  |
| V-type proton ATPase subunit H                            | ATP6V1H   | 3                                  |
| WAS/WASL-interacting protein family member 2              | WIPF2     | 1                                  |
| WD repeat-containing protein 1                            | WDR1      | 10                                 |
| Wiskott-Aldrich syndrome protein family member 2          | WASF2     | 3                                  |
| Xaa-Pro aminopeptidase 1                                  | XPNPEP1   | 1                                  |
| Xaa-Pro aminopeptidase 2                                  | XPNPEP2   | 9                                  |
| Xaa-Pro dipeptidase                                       | PEPD      | 2                                  |
| Xin actin-binding repeat-containing protein 1             | XIRP1     | 2                                  |
| Zinc finger CCCH-type antiviral protein 1                 | ZC3HAV1   | 1                                  |
| Zinc finger protein 185                                   | ZNF185    | 1                                  |
| Zinc-alpha-2-glycoprotein                                 | AZGP1     | 13                                 |
